# Supplementary material for: Green Methodologies for Copper(I)-Catalyzed Azide-Alkyne Cycloadditions: A Comparative Study
Source: MDPI journal article supplement (doi:10.3390/molecules24050973), 2019-03-10
Supplement: s1 [file s1]

## Supplementary Material

### Advantages of Green Methodologies-Microwave and Solvent-free

**Marissa N. Trujillo, Clayton J. Hull-Crew, Andrew D. Outlaw, Kevin A. Stewart, Loren J. Taylor,  
Laura F. George, Allison Duensing, Breanna M. Tracey and Allen M. Schoffstall\***

Department of Chemistry and Biochemistry, University of Colorado Colorado Springs (UCCS), Colorado Springs CO  
80918, United States

### Table of Contents

#### Spectra of Compounds 1-8

|                                                                                                        |         |
|--------------------------------------------------------------------------------------------------------|---------|
| Compound <b>1</b> : 1-Benzyl-4-phenyl-1 <i>H</i> -1,2,3-triazole                                       | S2-S4   |
| Compound <b>2</b> : Methyl 1-benzyl-1 <i>H</i> -1,2,3-triazole-4-carboxylate                           | S5-S7   |
| Compound <b>3</b> : 2-(1-Benzyl-1 <i>H</i> -1,2,3-triazol-4-yl)-ethanol                                | S8-S10  |
| Compound <b>4</b> : 1-(2-Trifluoromethylbenzyl)-4-(2-trifluoromethylphenyl)-1 <i>H</i> -1,2,3-triazole | S11-S18 |
| Compound <b>5</b> : Phenyl-[1-(2-trifluoromethylbenzyl)-1 <i>H</i> -1,2,3-triazol-4-yl]-methanol       | S19-S24 |
| Compound <b>6</b> : 1-(3-Fluorobenzyl)-4-phenethyl-1 <i>H</i> -1,2,3-triazole                          | S25-S29 |
| Compound <b>7</b> : 1-(4-Fluorobenzyl)-4-phenethyl-1 <i>H</i> -1,2,3-triazole                          | S30-S34 |
| Compound <b>8</b> : 4-(3-Fluorophenyl)-1-(3-trifluoromethylbenzyl)-1 <i>H</i> -1,2,3-triazole          | S35-S39 |

#### Spectra of Crude Compounds 1-3

|                                                 |         |
|-------------------------------------------------|---------|
| Spectra from the scale up experiments           | S40-S43 |
| Spectra from equimolar experiments              | S44-S45 |
| Spectra from experiments with 50% excess alkyne | S46-S49 |

$^1\text{H}$  NMR spectrum of **1**

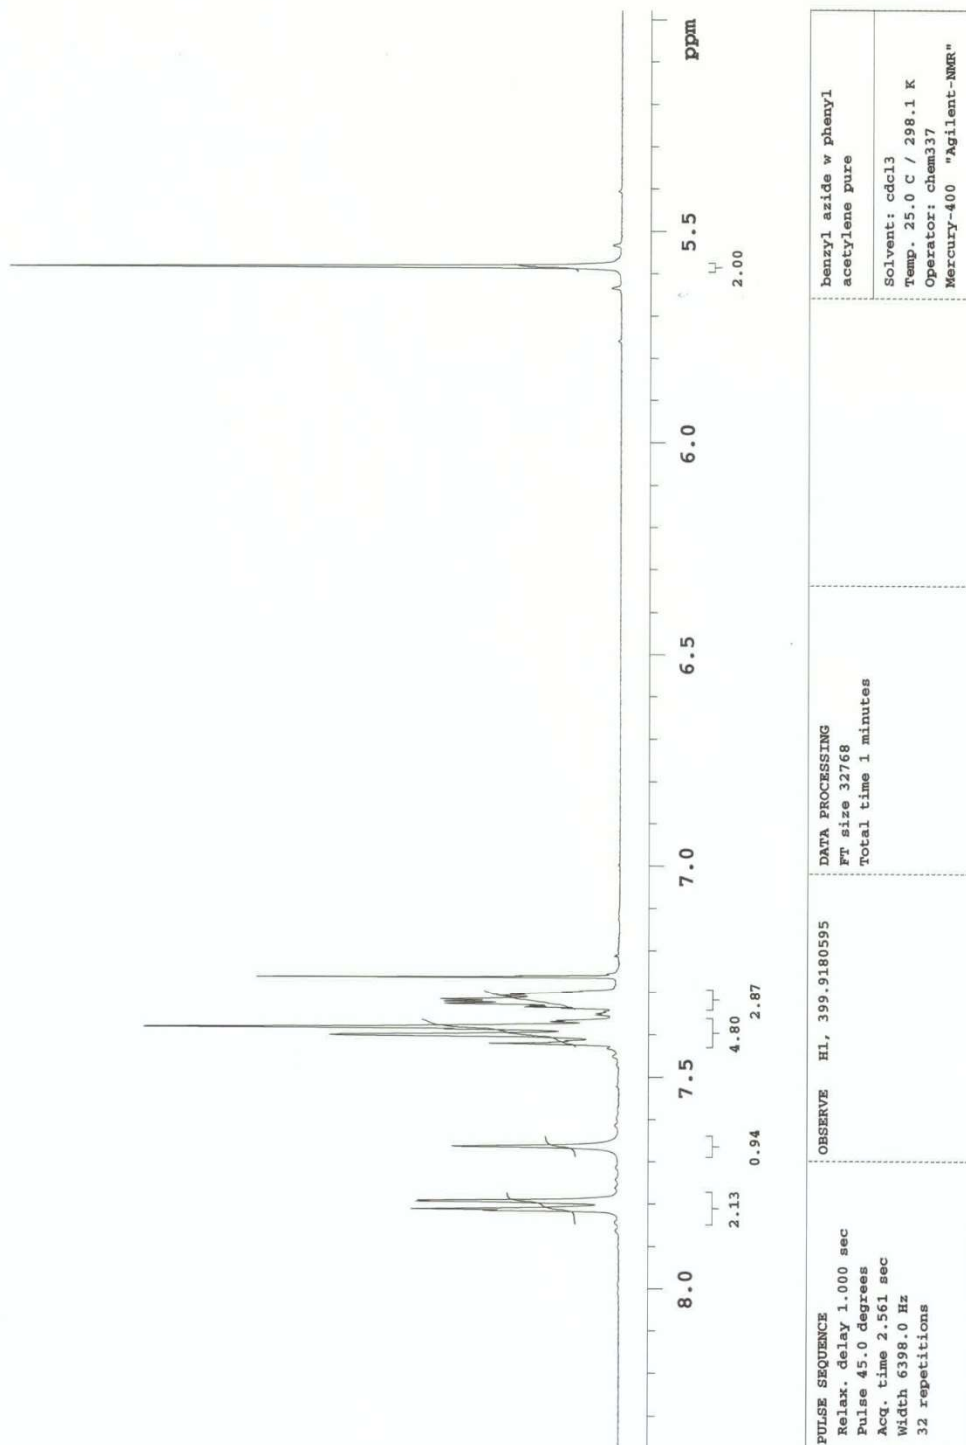

<sup>13</sup>C NMR spectrum of **1**

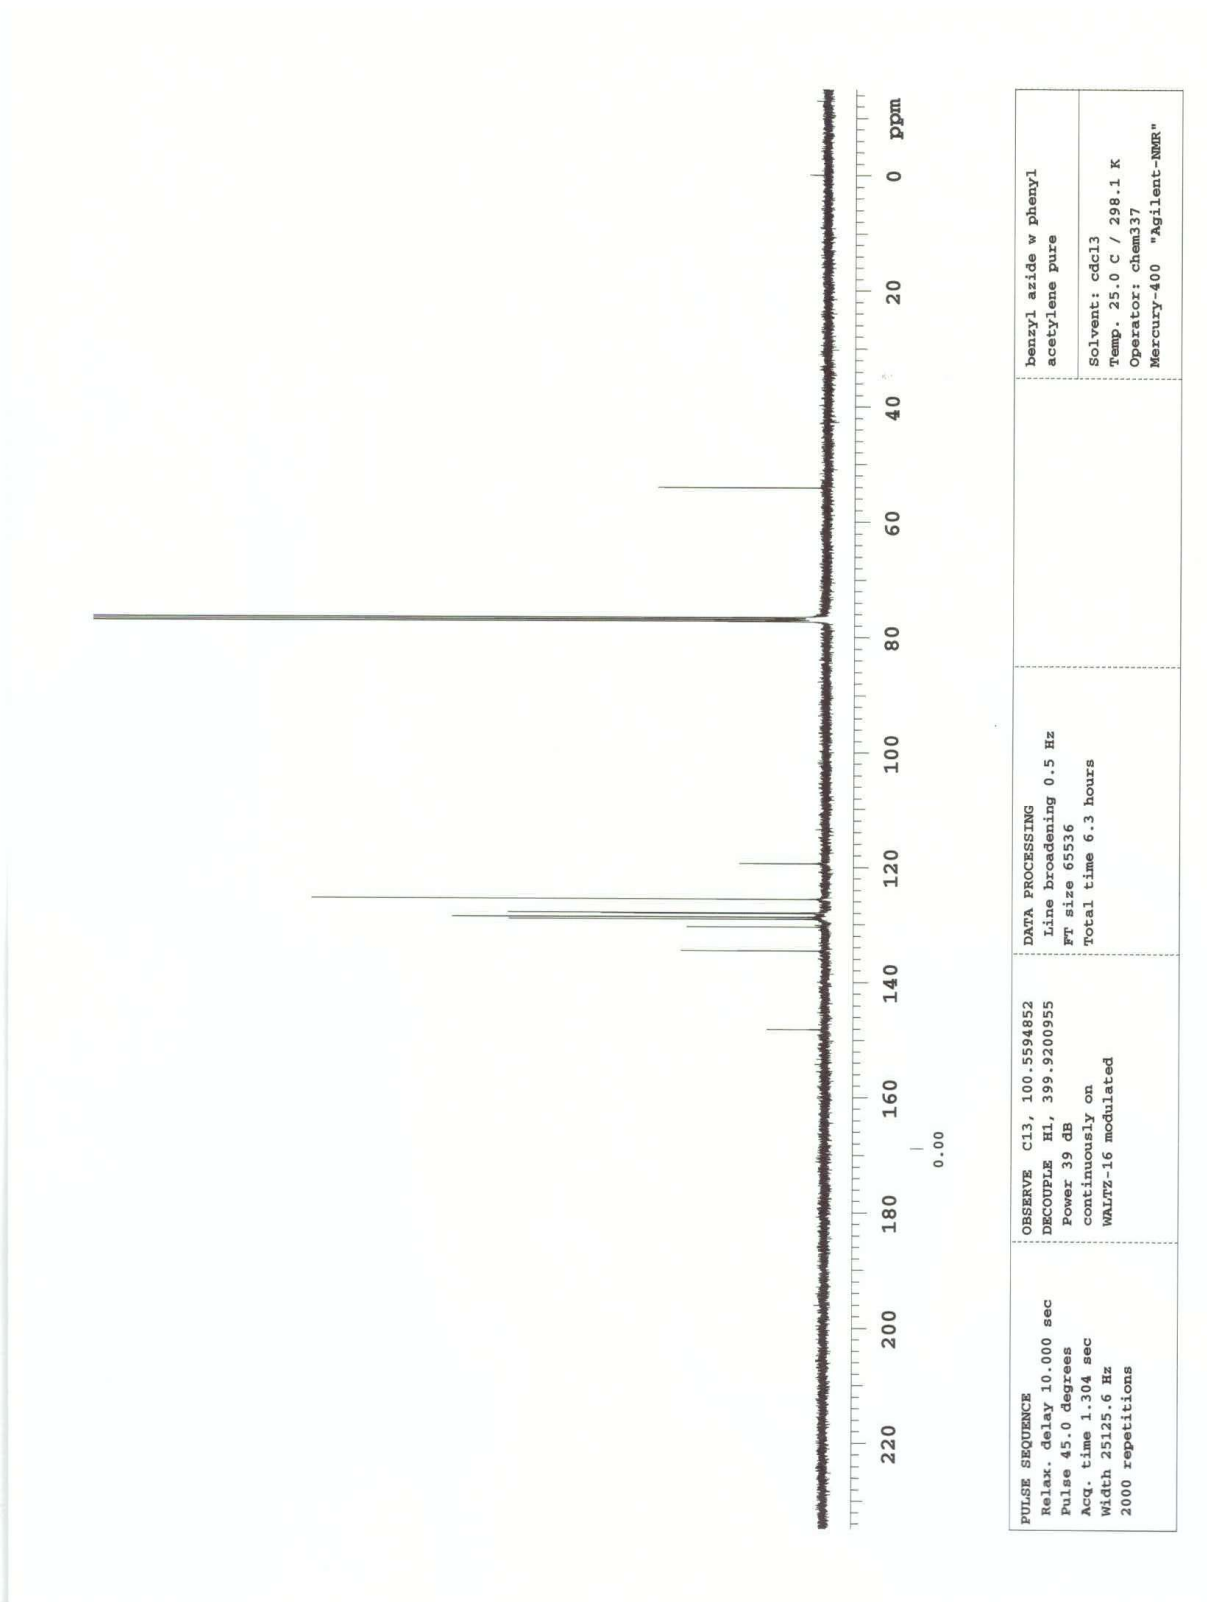

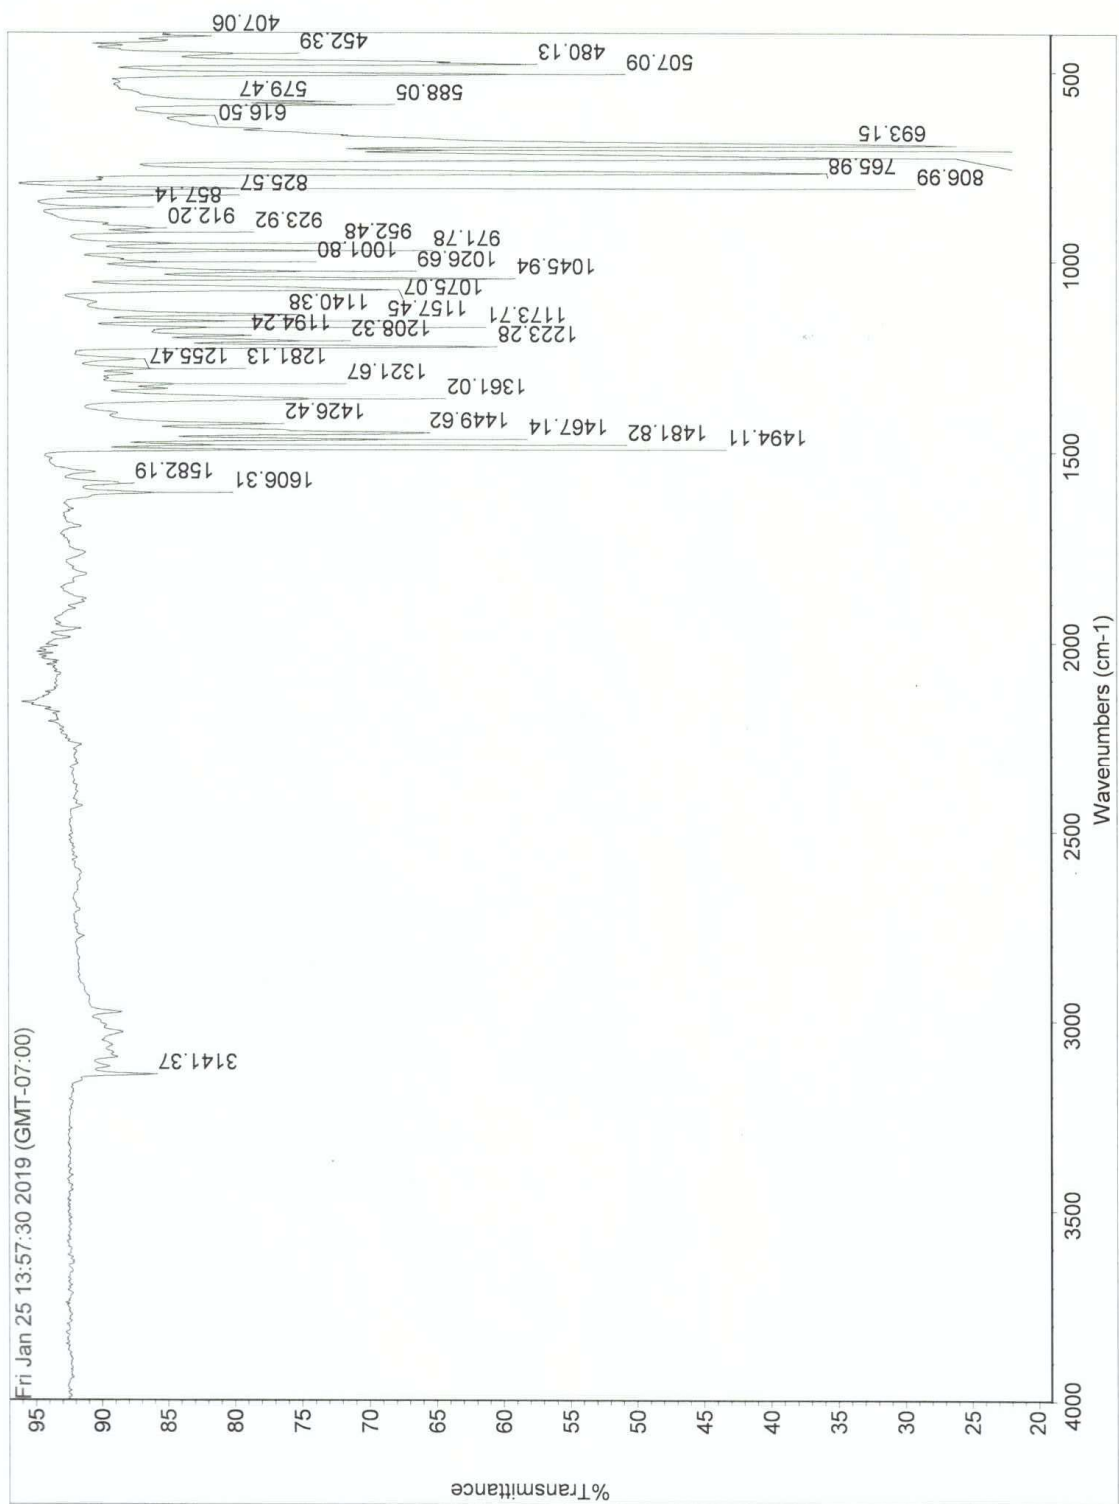

FTIR spectrum of **1**

<sup>1</sup>H NMR spectrum of **2**

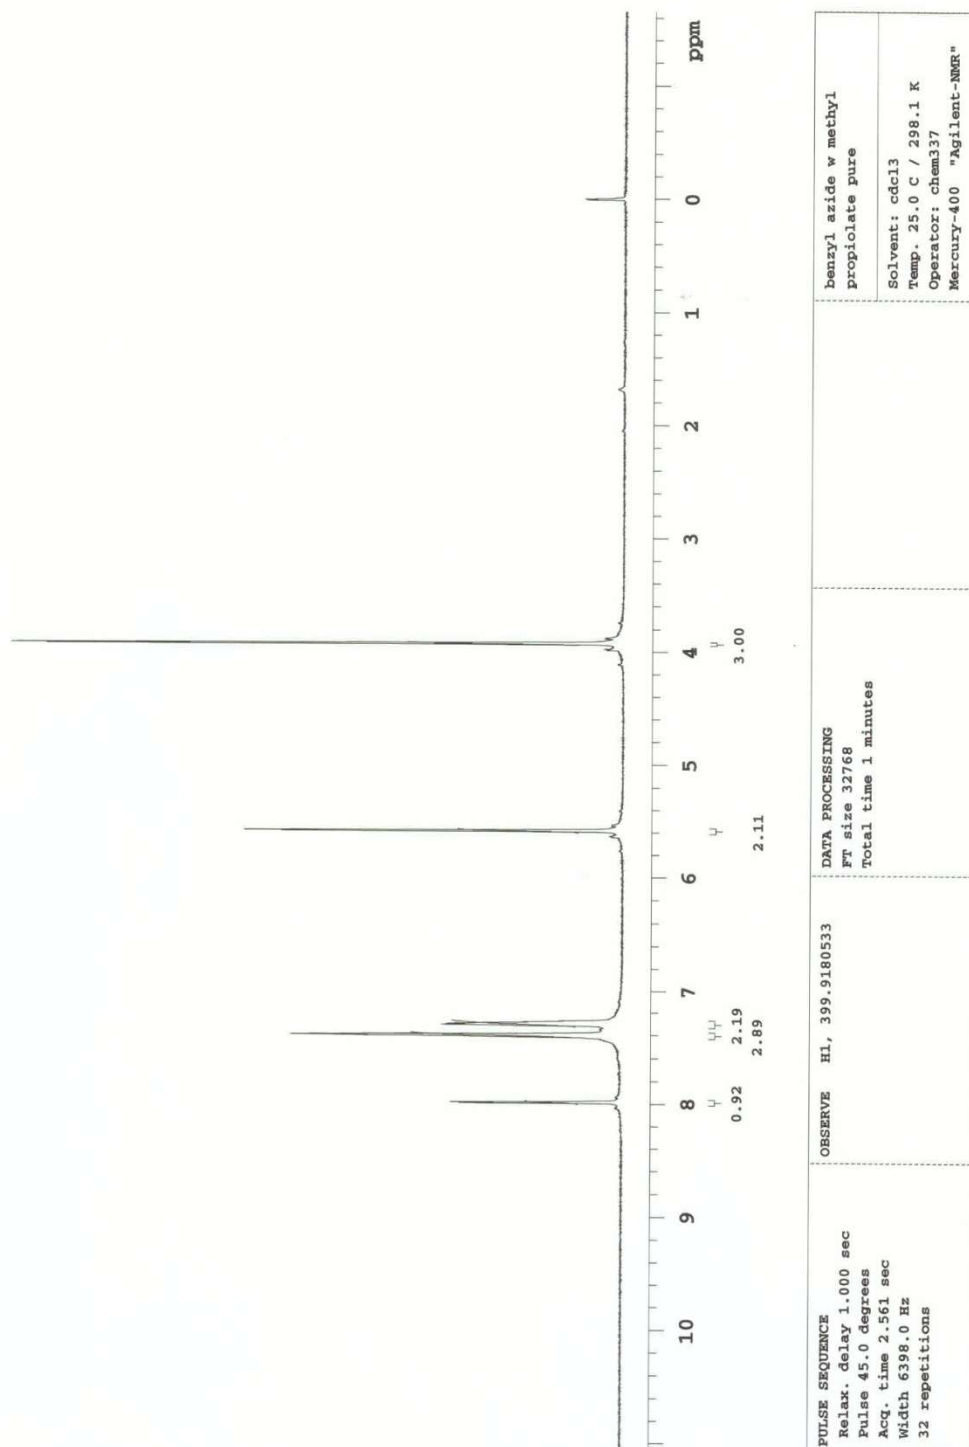

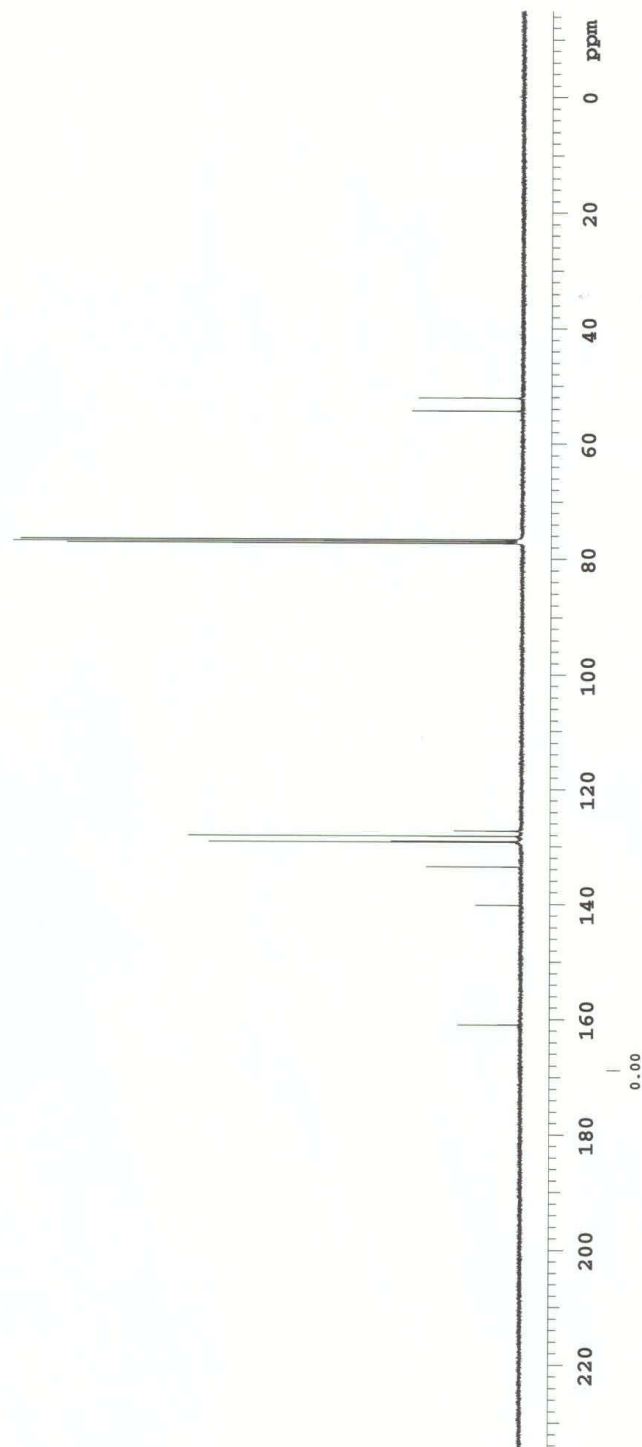

|                                                                                                                                       |                                                                                                                            |                                                                                           |                                                                                                                                            |
|---------------------------------------------------------------------------------------------------------------------------------------|----------------------------------------------------------------------------------------------------------------------------|-------------------------------------------------------------------------------------------|--------------------------------------------------------------------------------------------------------------------------------------------|
| <b>PULSE SEQUENCE</b><br>Relax. delay 10.000 sec<br>Pulse 45.0 degrees<br>Acq. time 1.304 sec<br>Width 25125.6 Hz<br>2000 repetitions | <b>OBSERVE</b> C13, 100.5594852<br><b>DECOUPLE</b> H1, 399.9200955<br>Power 39 dB<br>continuously on<br>WALTZ-16 modulated | <b>DATA PROCESSING</b><br>Line broadening 0.5 Hz<br>FT size 65536<br>Total time 6.3 hours | benzyl azide w methyl<br>propiolate pure<br><br>Solvent: cdcl3<br>Temp. 25.0 C / 298.1 K<br>Operator: chem337<br>Mercury-400 "Agilent-NMR" |
|---------------------------------------------------------------------------------------------------------------------------------------|----------------------------------------------------------------------------------------------------------------------------|-------------------------------------------------------------------------------------------|--------------------------------------------------------------------------------------------------------------------------------------------|

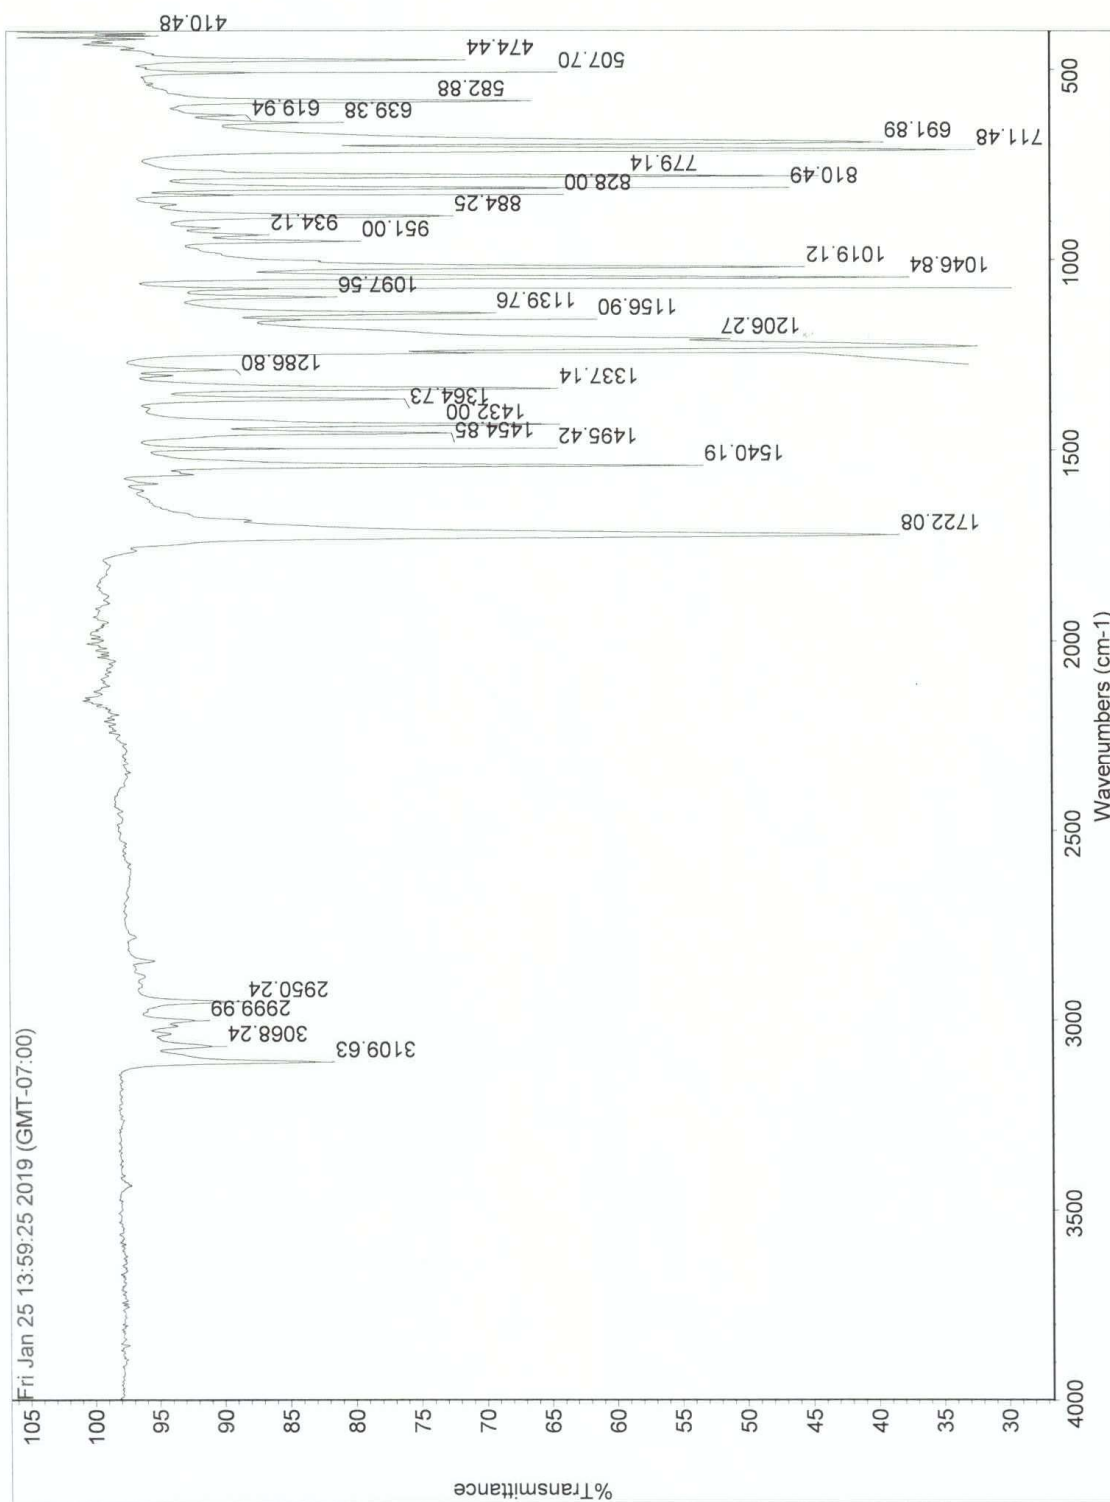

FTIR spectrum of **2**

$^1\text{H}$  NMR spectrum of **3**

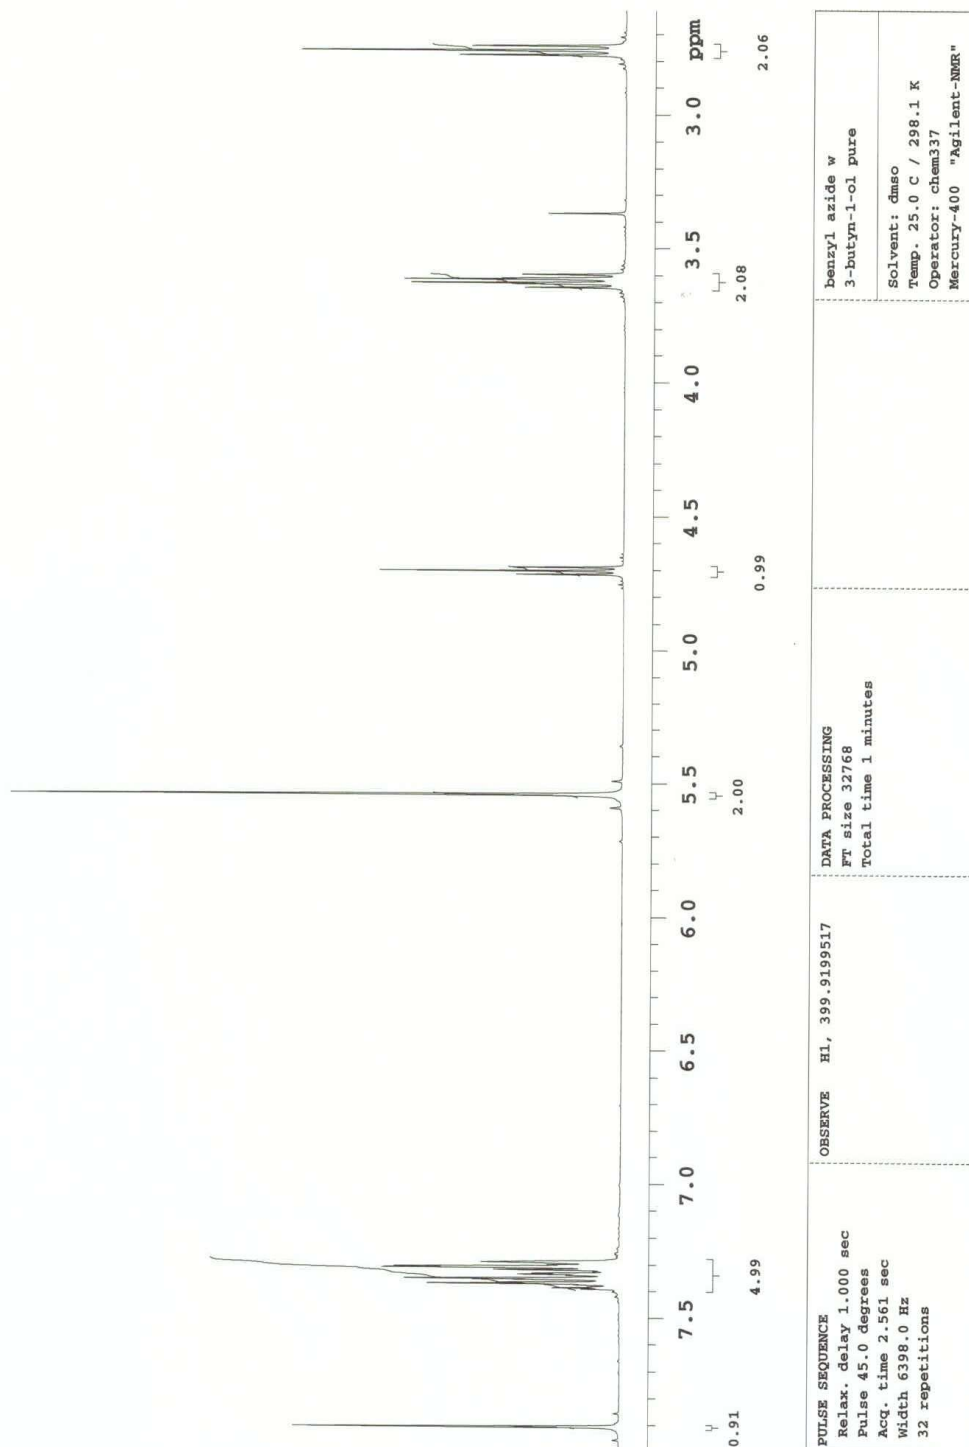



<sup>13</sup>C NMR spectrum of **3**

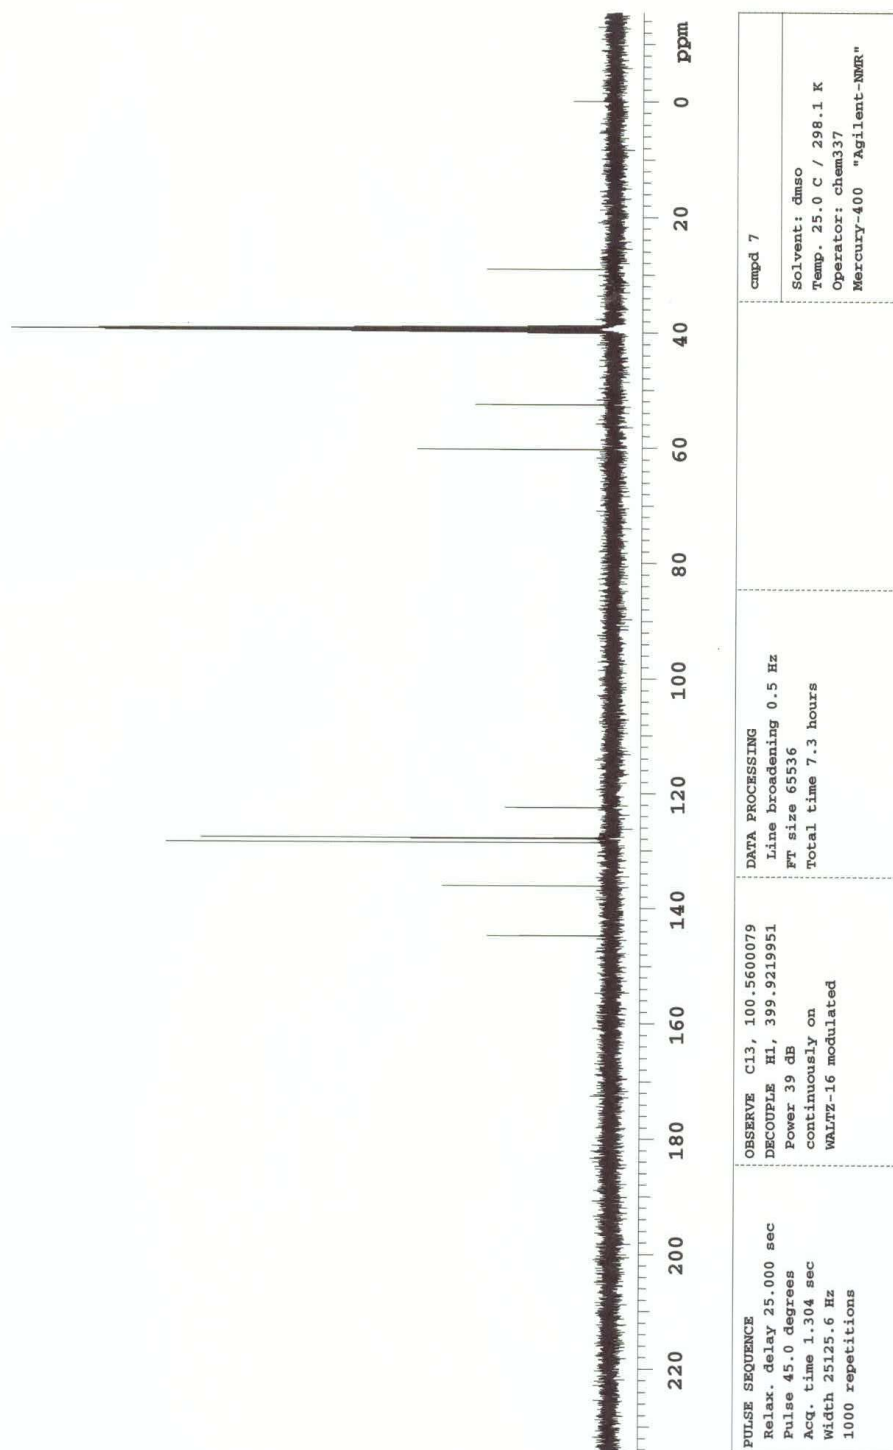

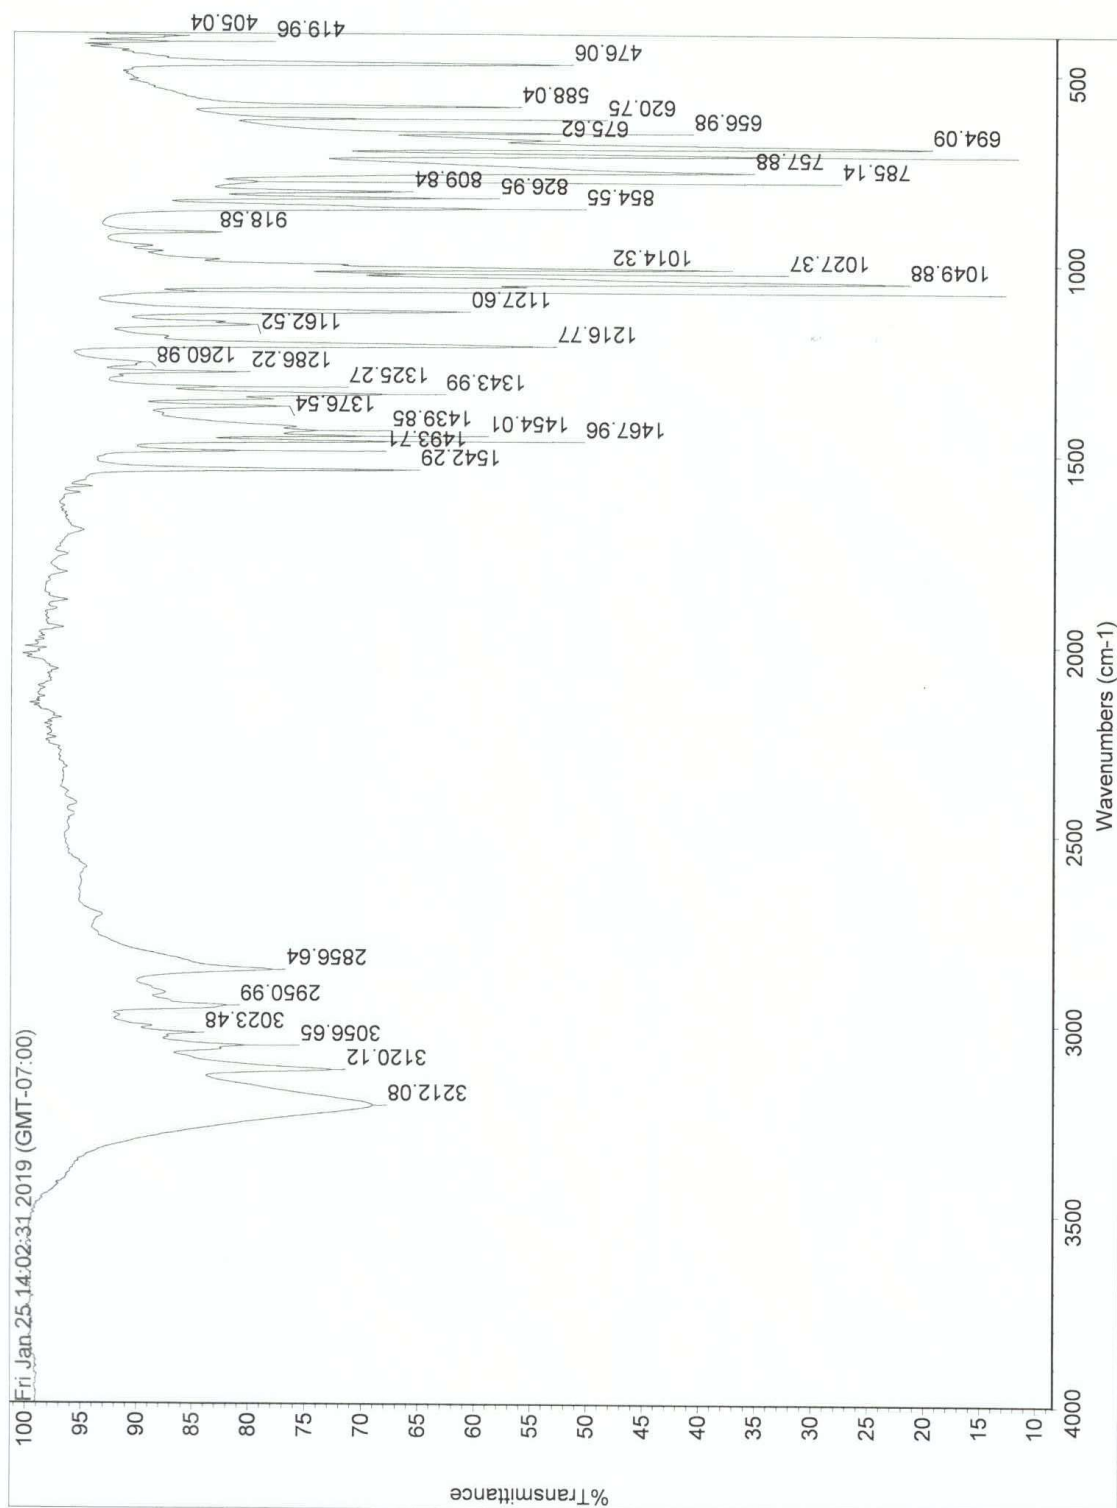

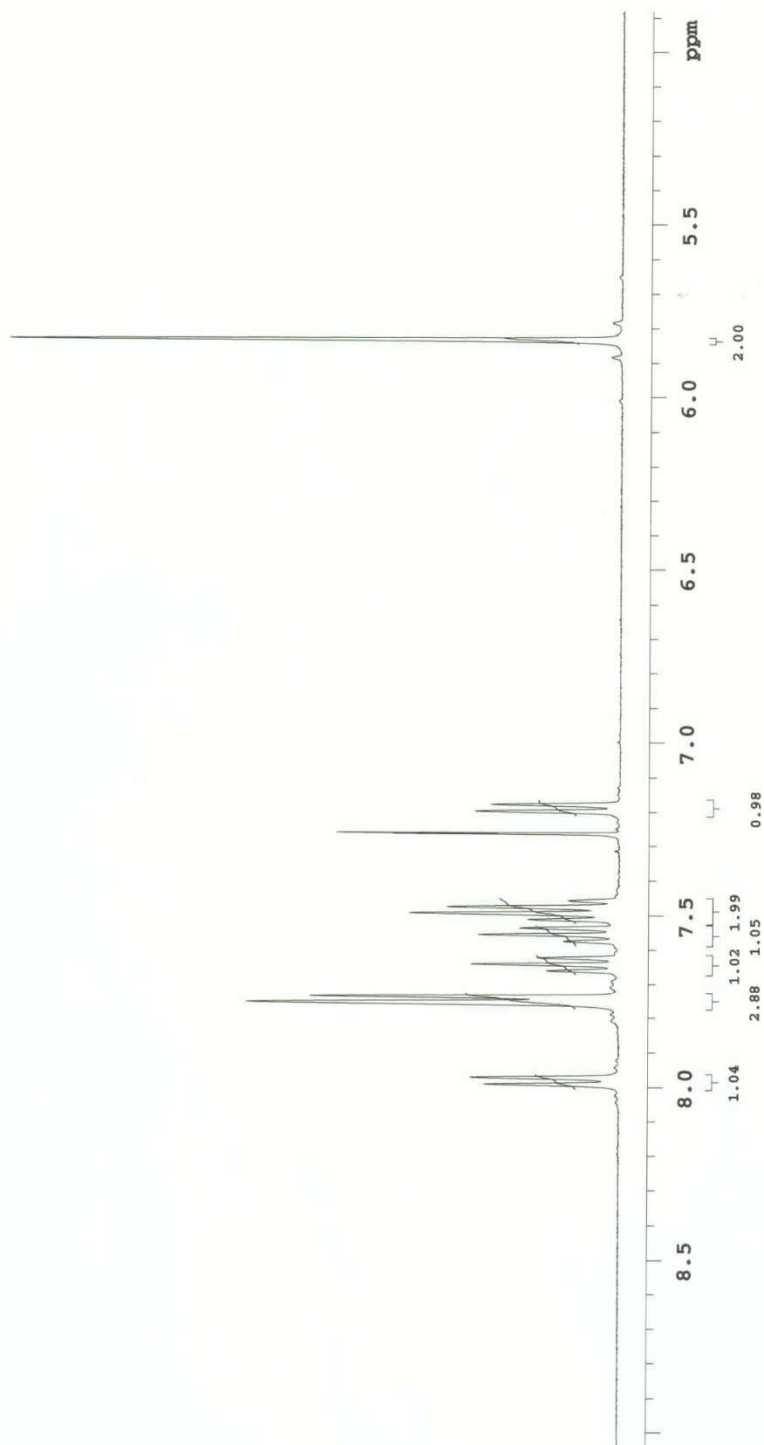

|                                                                                                                                   |                                |                                                                 |                                                                                                              |
|-----------------------------------------------------------------------------------------------------------------------------------|--------------------------------|-----------------------------------------------------------------|--------------------------------------------------------------------------------------------------------------|
| <b>PULSE SEQUENCE</b><br>Relax. delay 1.000 sec<br>Pulse 45.0 degrees<br>Acq. time 2.561 sec<br>Width 6398.0 Hz<br>32 repetitions | <b>OBSERVE</b> H1, 399.9180587 | <b>DATA PROCESSING</b><br>F1 size 32768<br>Total time 1 minutes | <b>compd 4</b><br>Solvent: cdcl3<br>Temp. 25.0 C / 298.1 K<br>Operator: chem337<br>Mercury-400 "Agilent-NMR" |
|-----------------------------------------------------------------------------------------------------------------------------------|--------------------------------|-----------------------------------------------------------------|--------------------------------------------------------------------------------------------------------------|

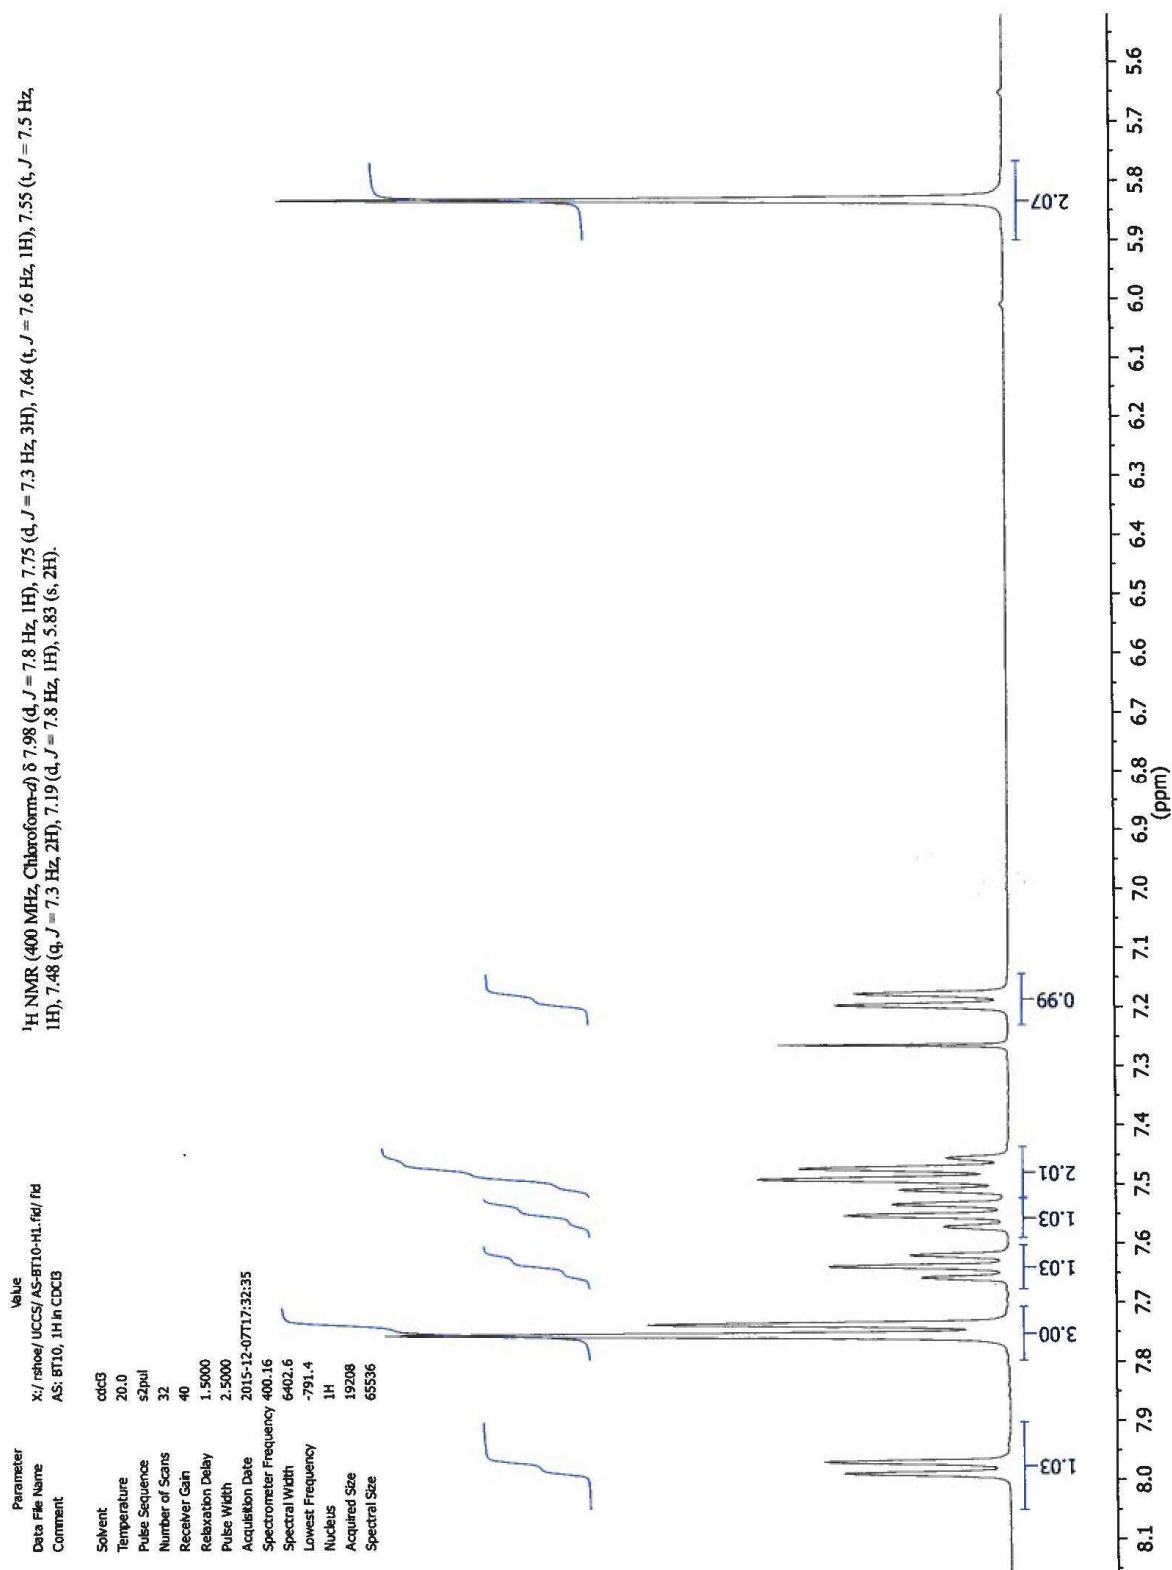



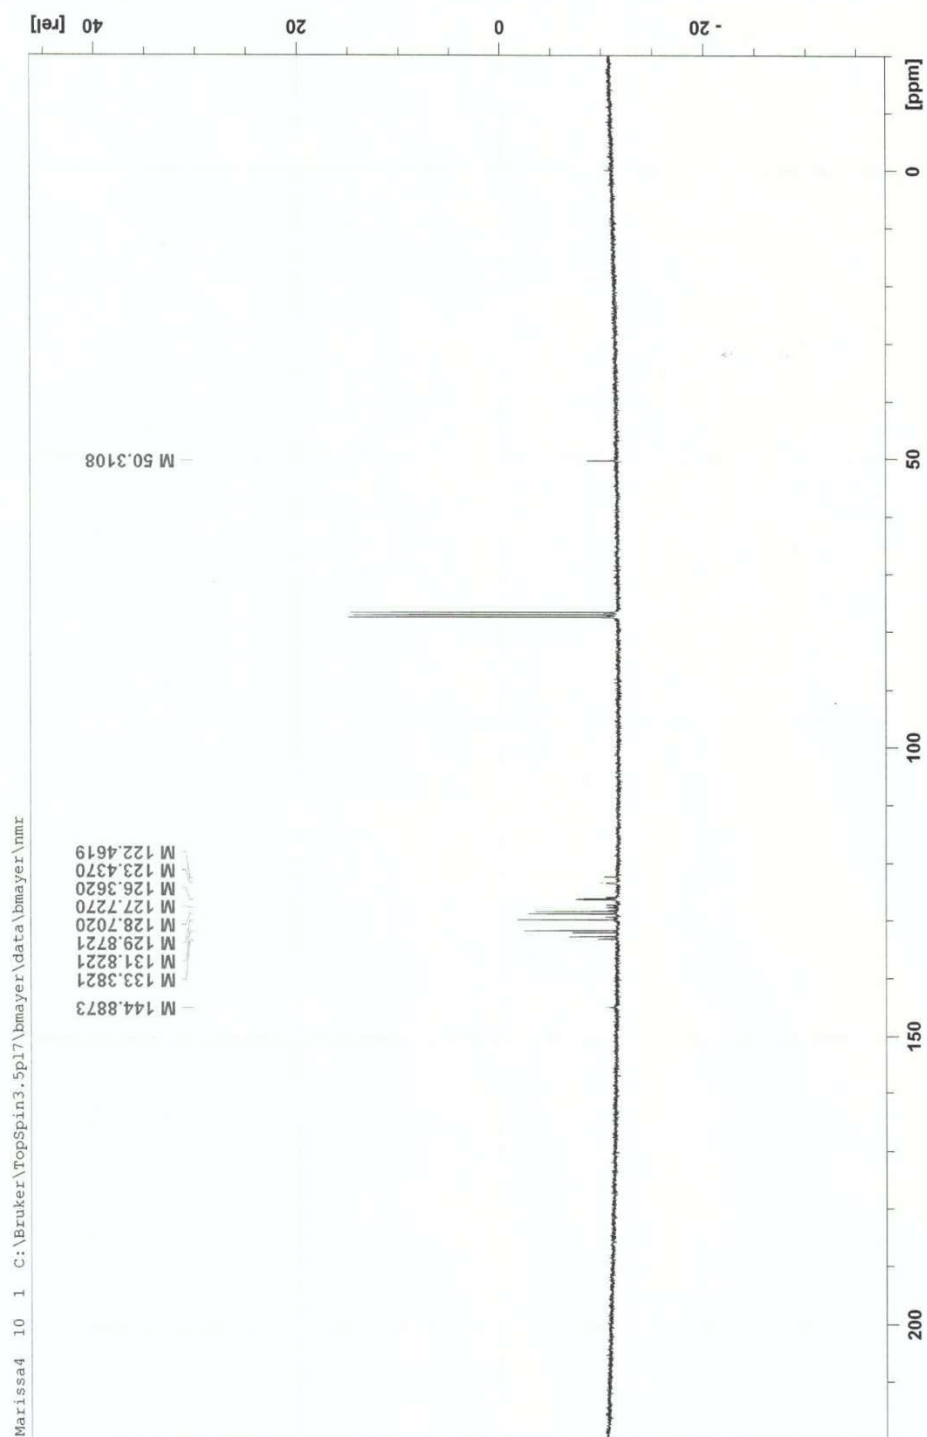

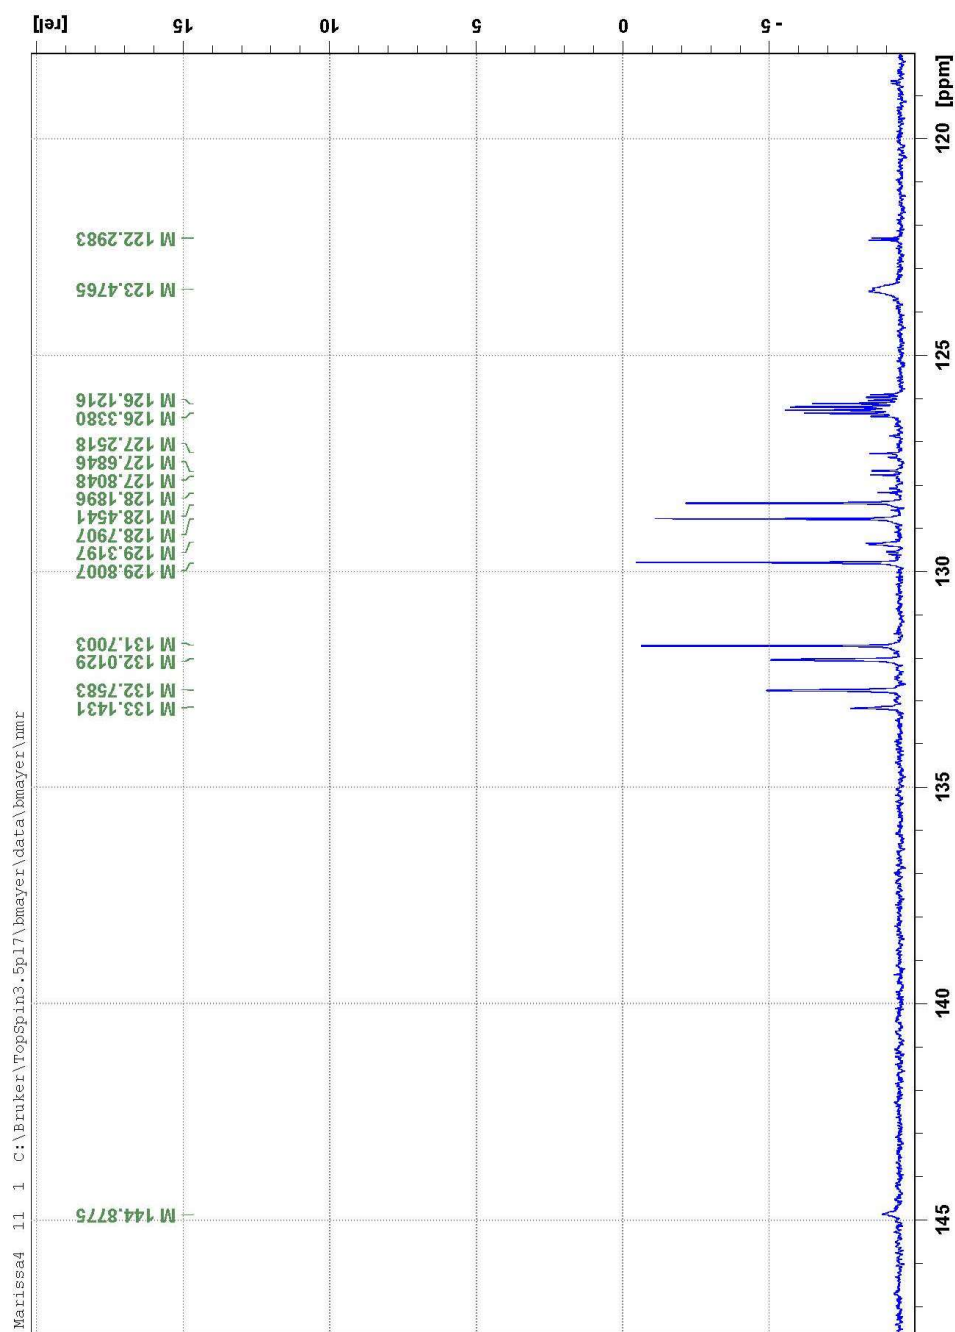

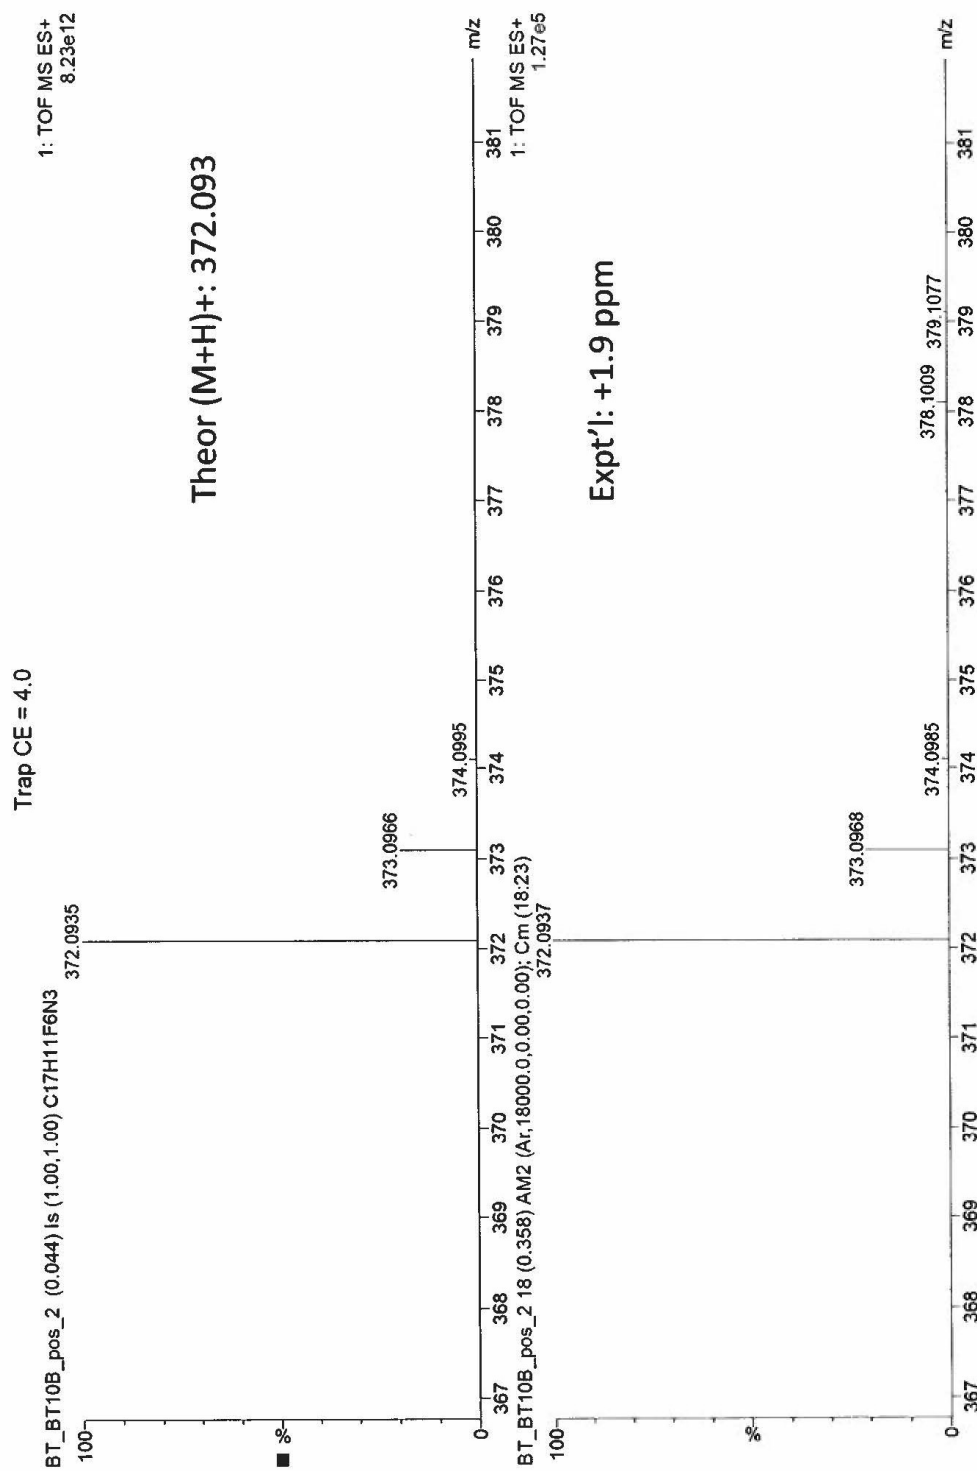



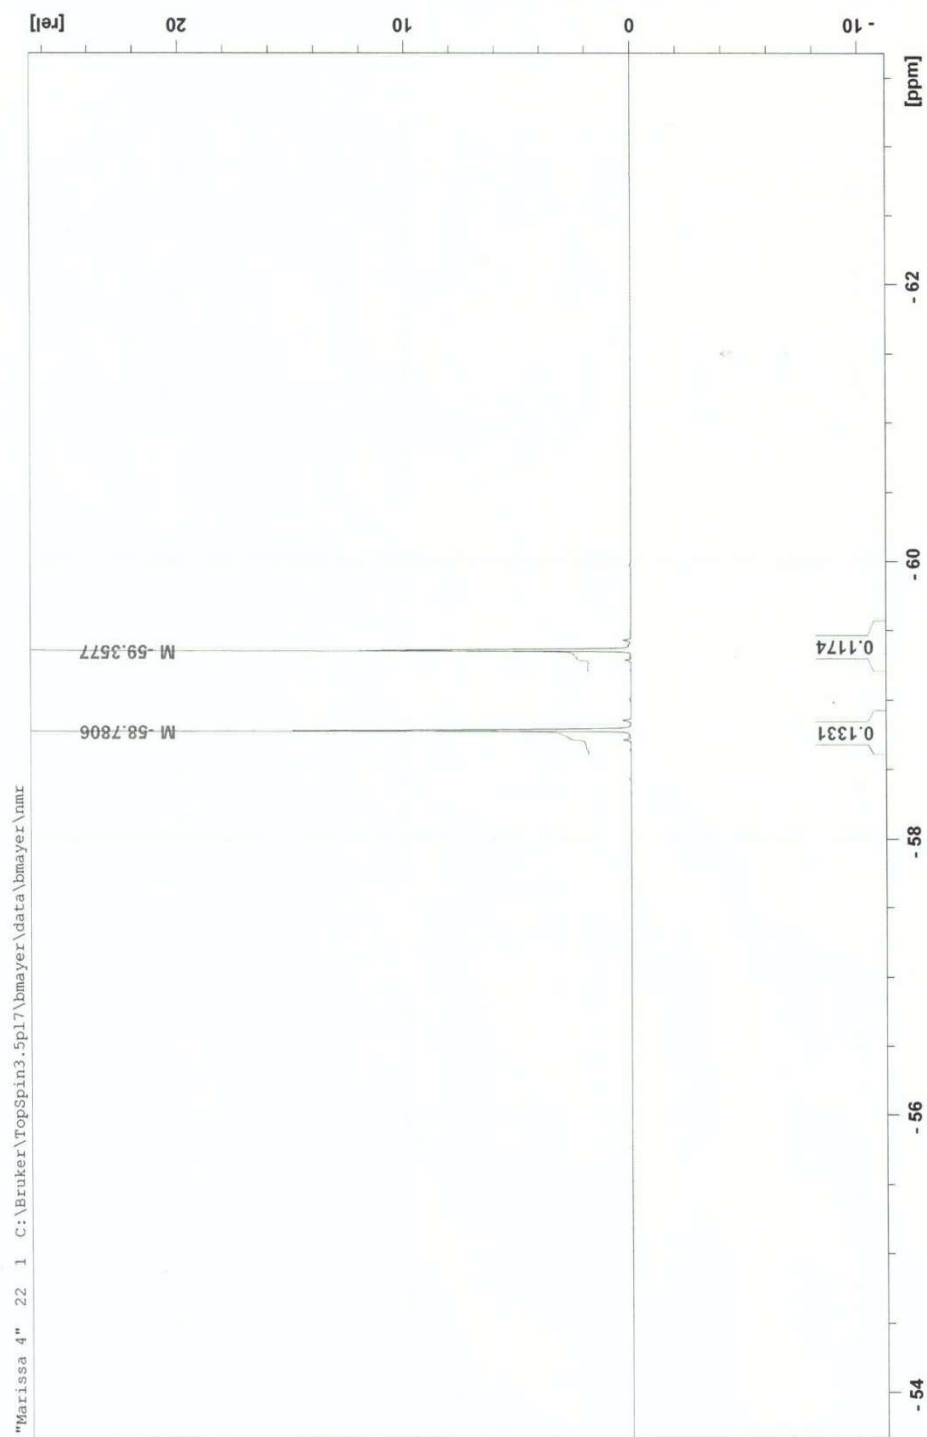

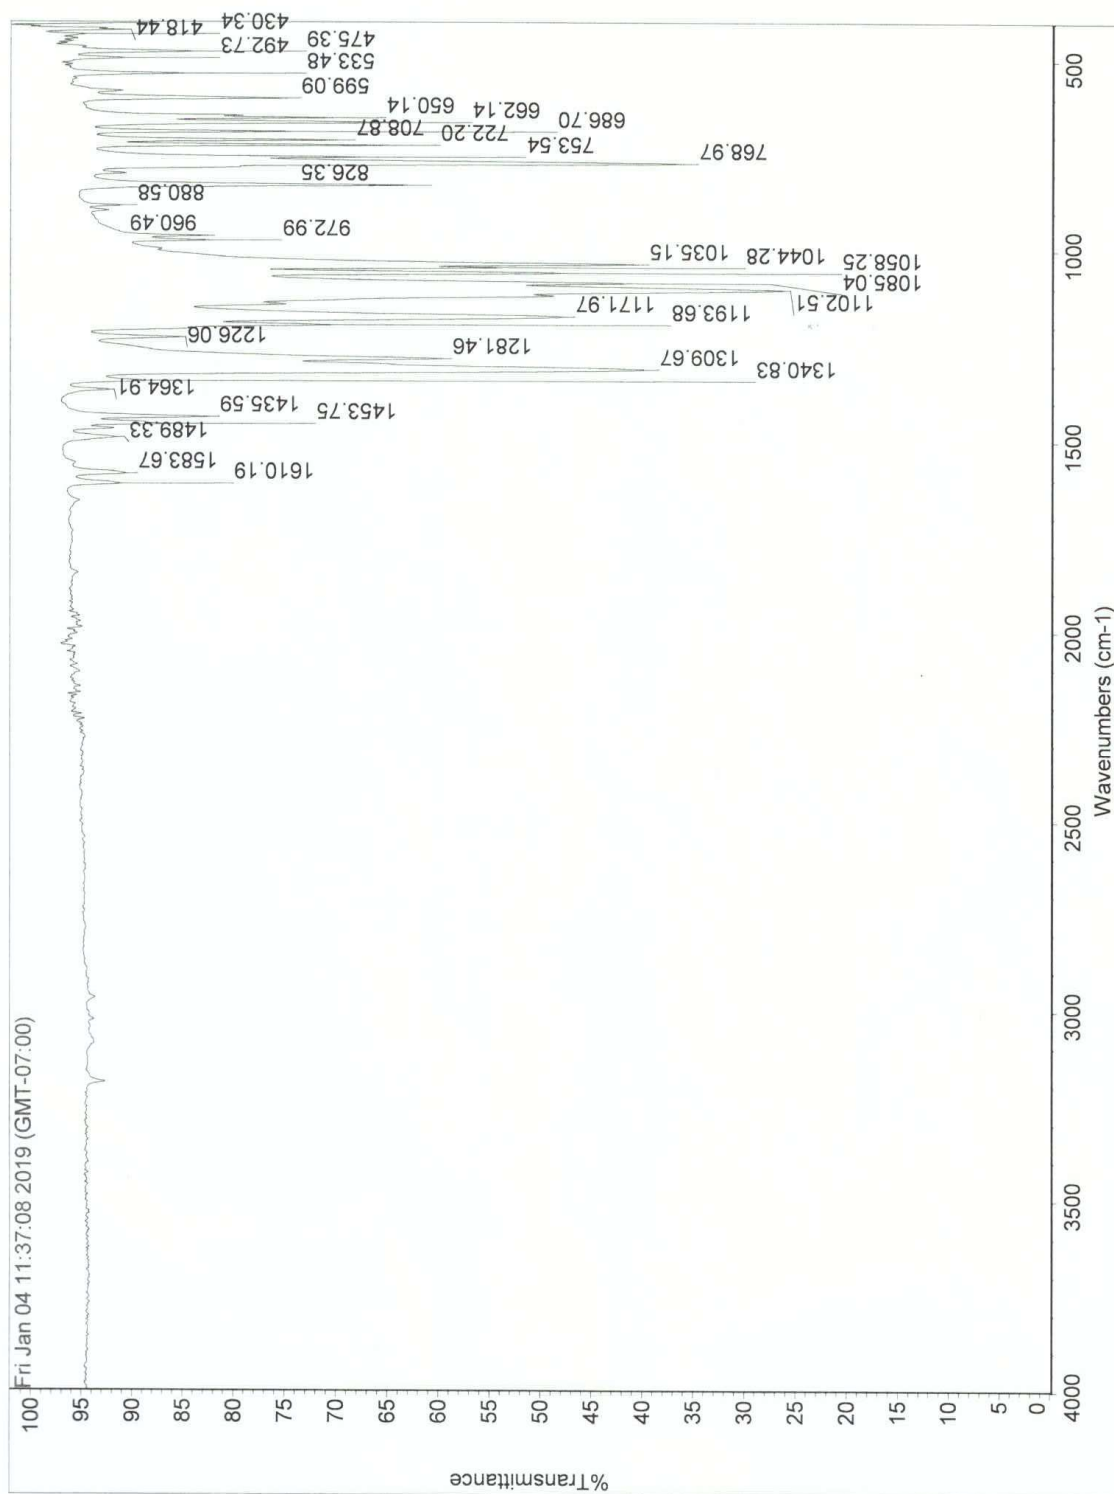

FTIR spectrum of 4



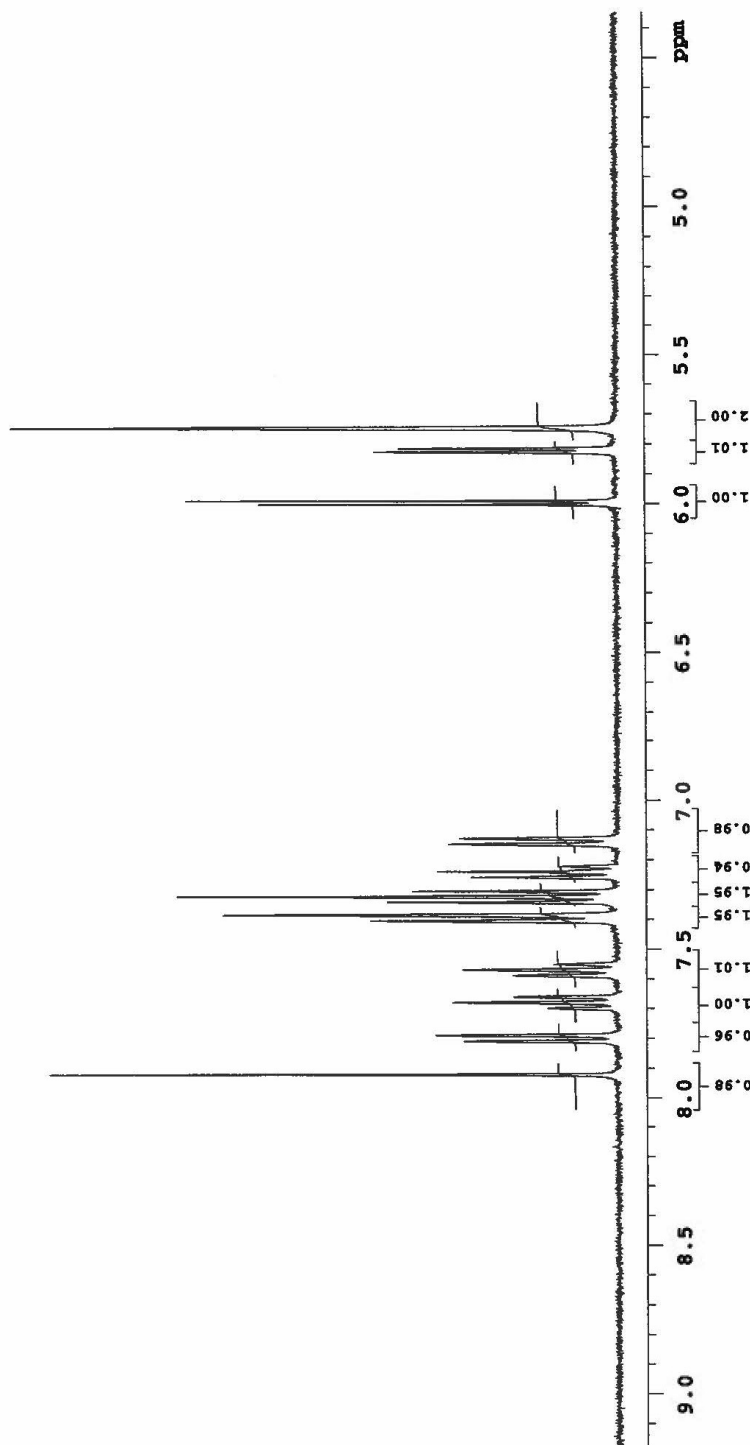

|                                                                                                                                                       |                                |                                                                        |                                                                                                                                     |
|-------------------------------------------------------------------------------------------------------------------------------------------------------|--------------------------------|------------------------------------------------------------------------|-------------------------------------------------------------------------------------------------------------------------------------|
| <p>PULSE SEQUENCE</p> <p>Relax. delay 1.000 sec</p> <p>Pulse 45.0 degrees</p> <p>Acq. time 2.561 sec</p> <p>Width 6398.0 Hz</p> <p>16 repetitions</p> | <p>OBSERVE H1, 399.9199537</p> | <p>DATA PROCESSING</p> <p>Fr size 32768</p> <p>Total time 1 minute</p> | <p>CS-20-7, 1H in CDCl3</p> <p>Solvent: dmsc</p> <p>Ambient temperature</p> <p>Operator: Henry</p> <p>Mercury-400 "Agilent-NMR"</p> |
|-------------------------------------------------------------------------------------------------------------------------------------------------------|--------------------------------|------------------------------------------------------------------------|-------------------------------------------------------------------------------------------------------------------------------------|

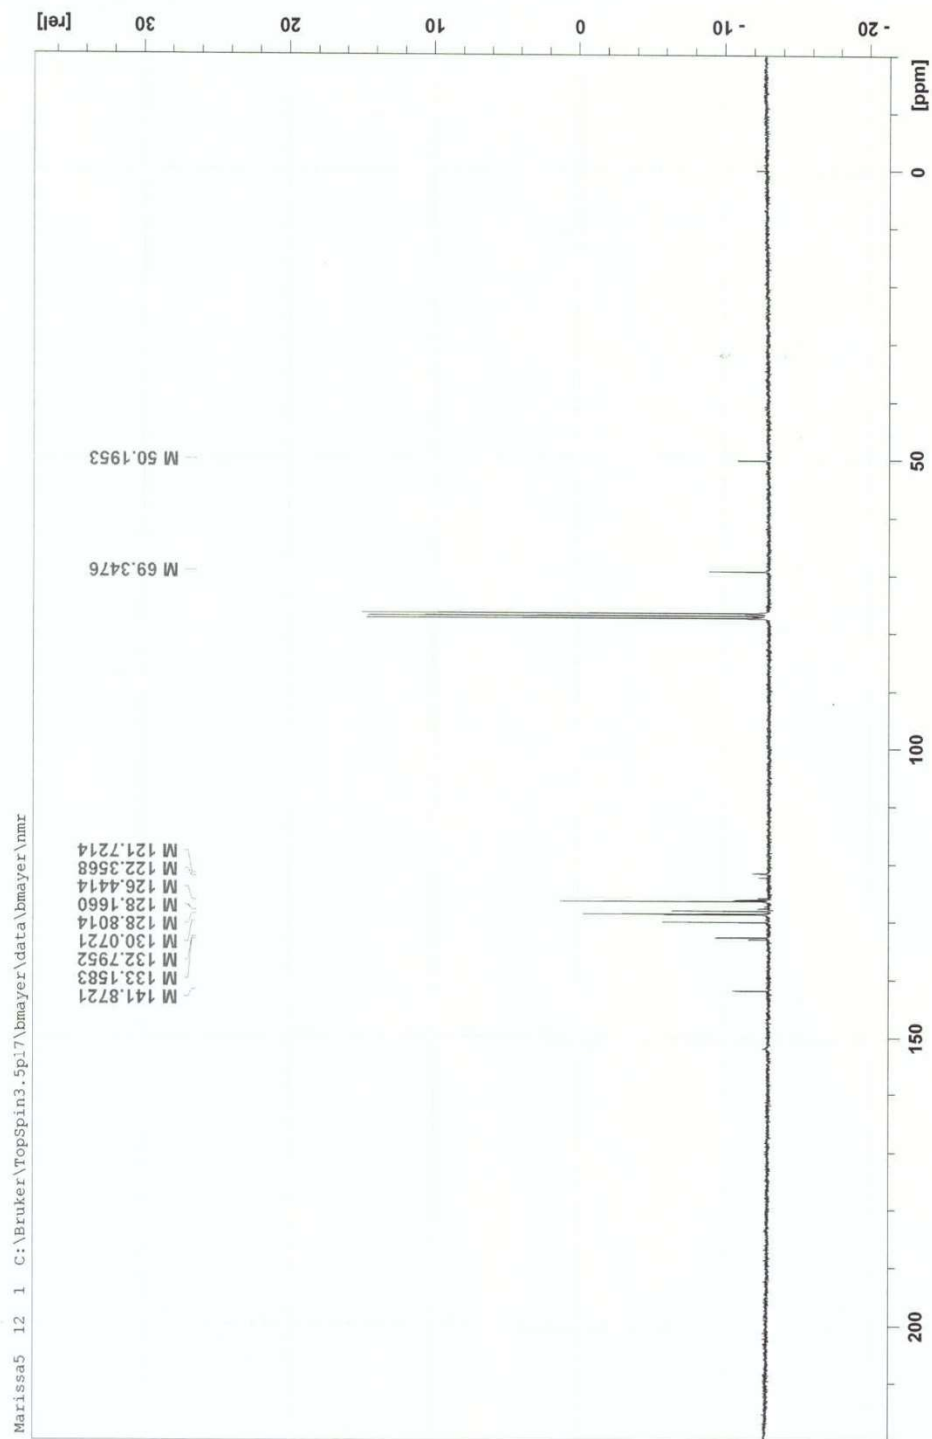

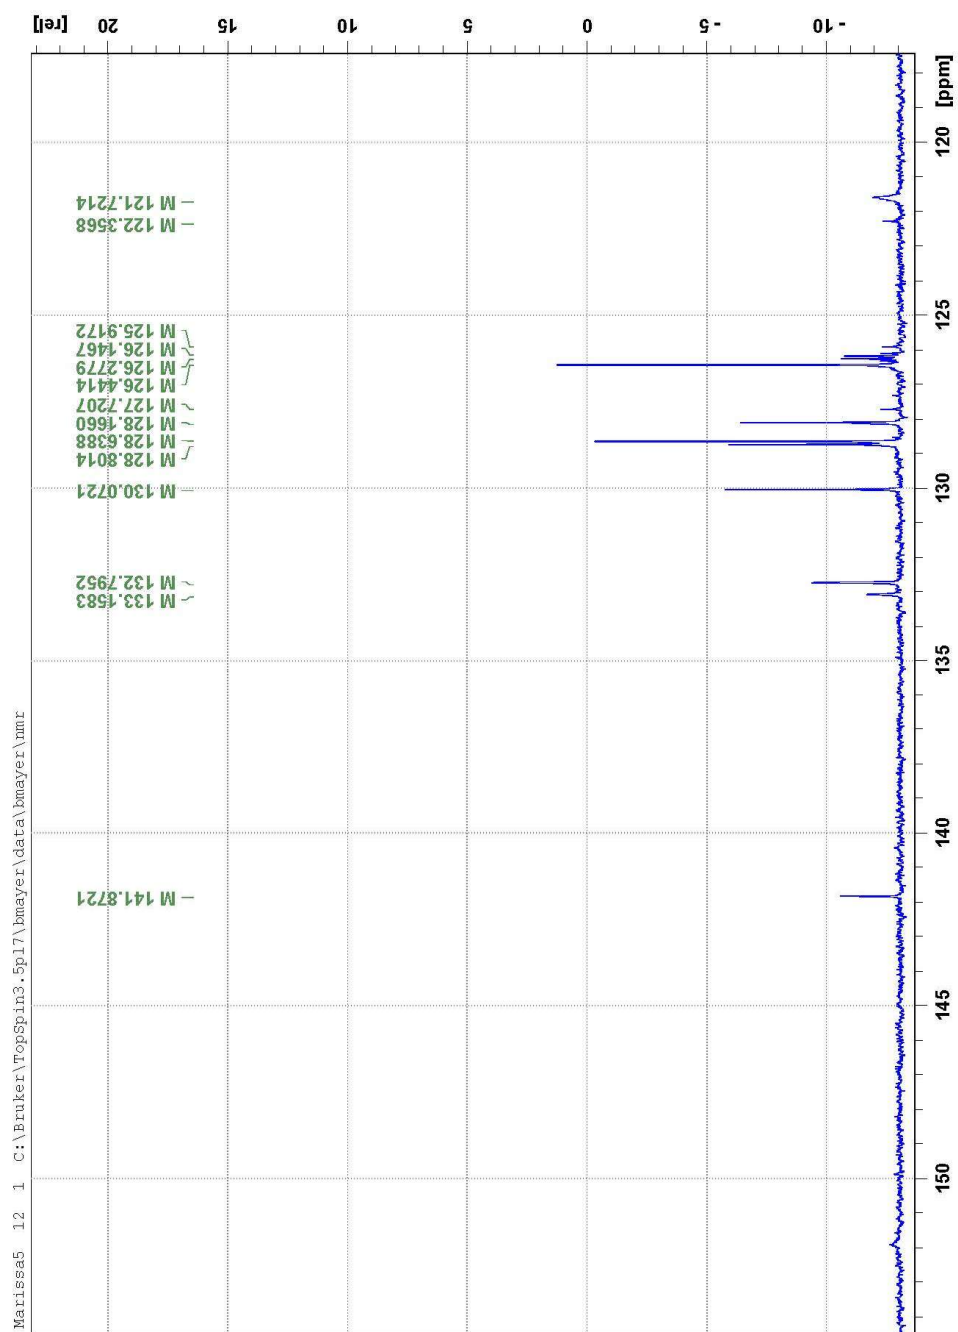

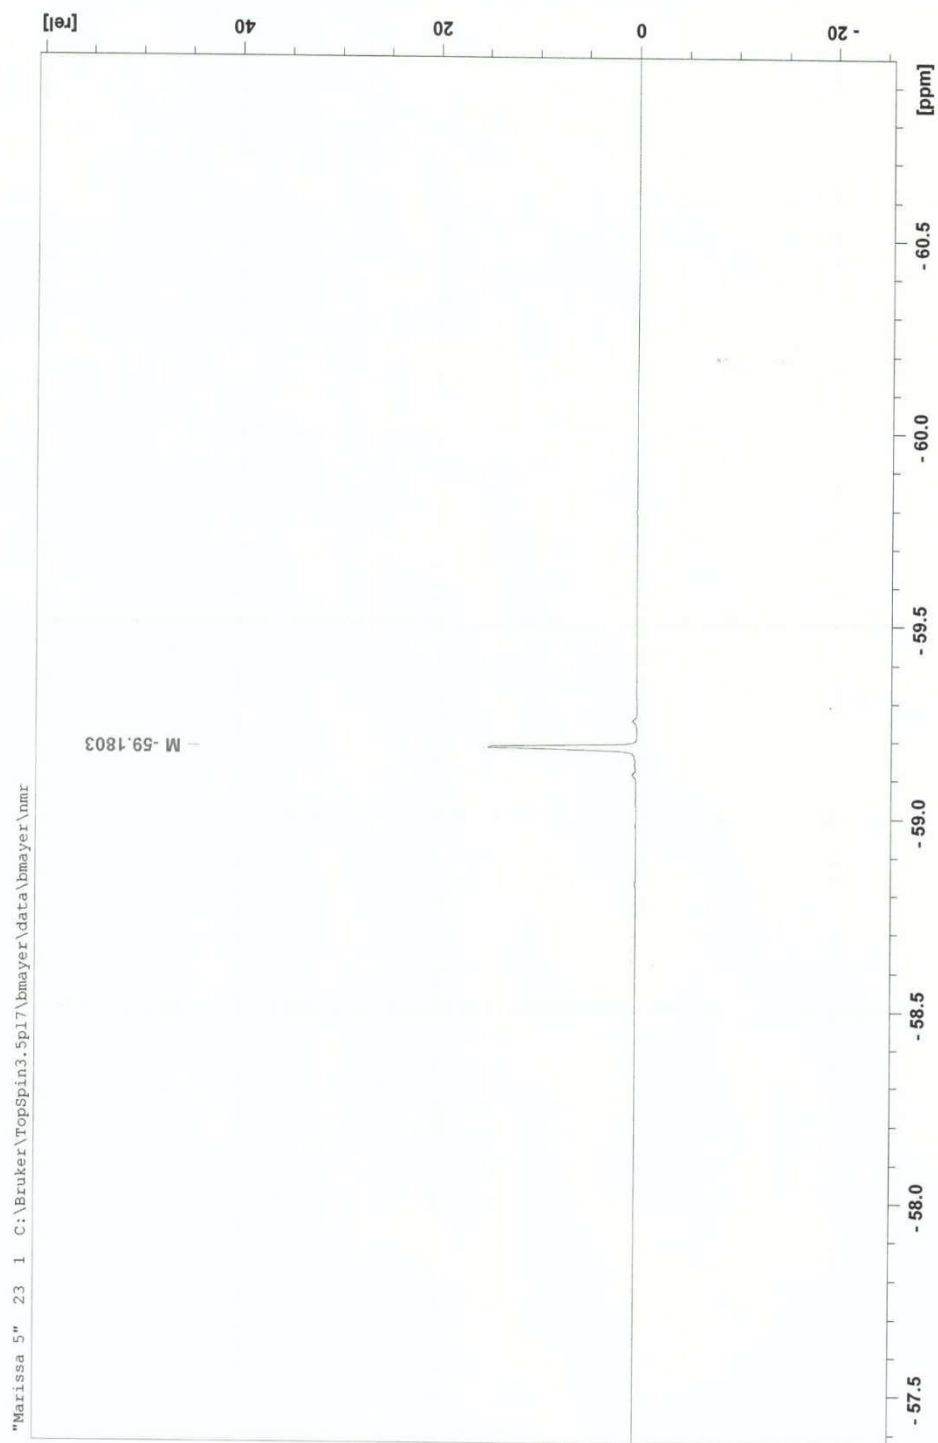

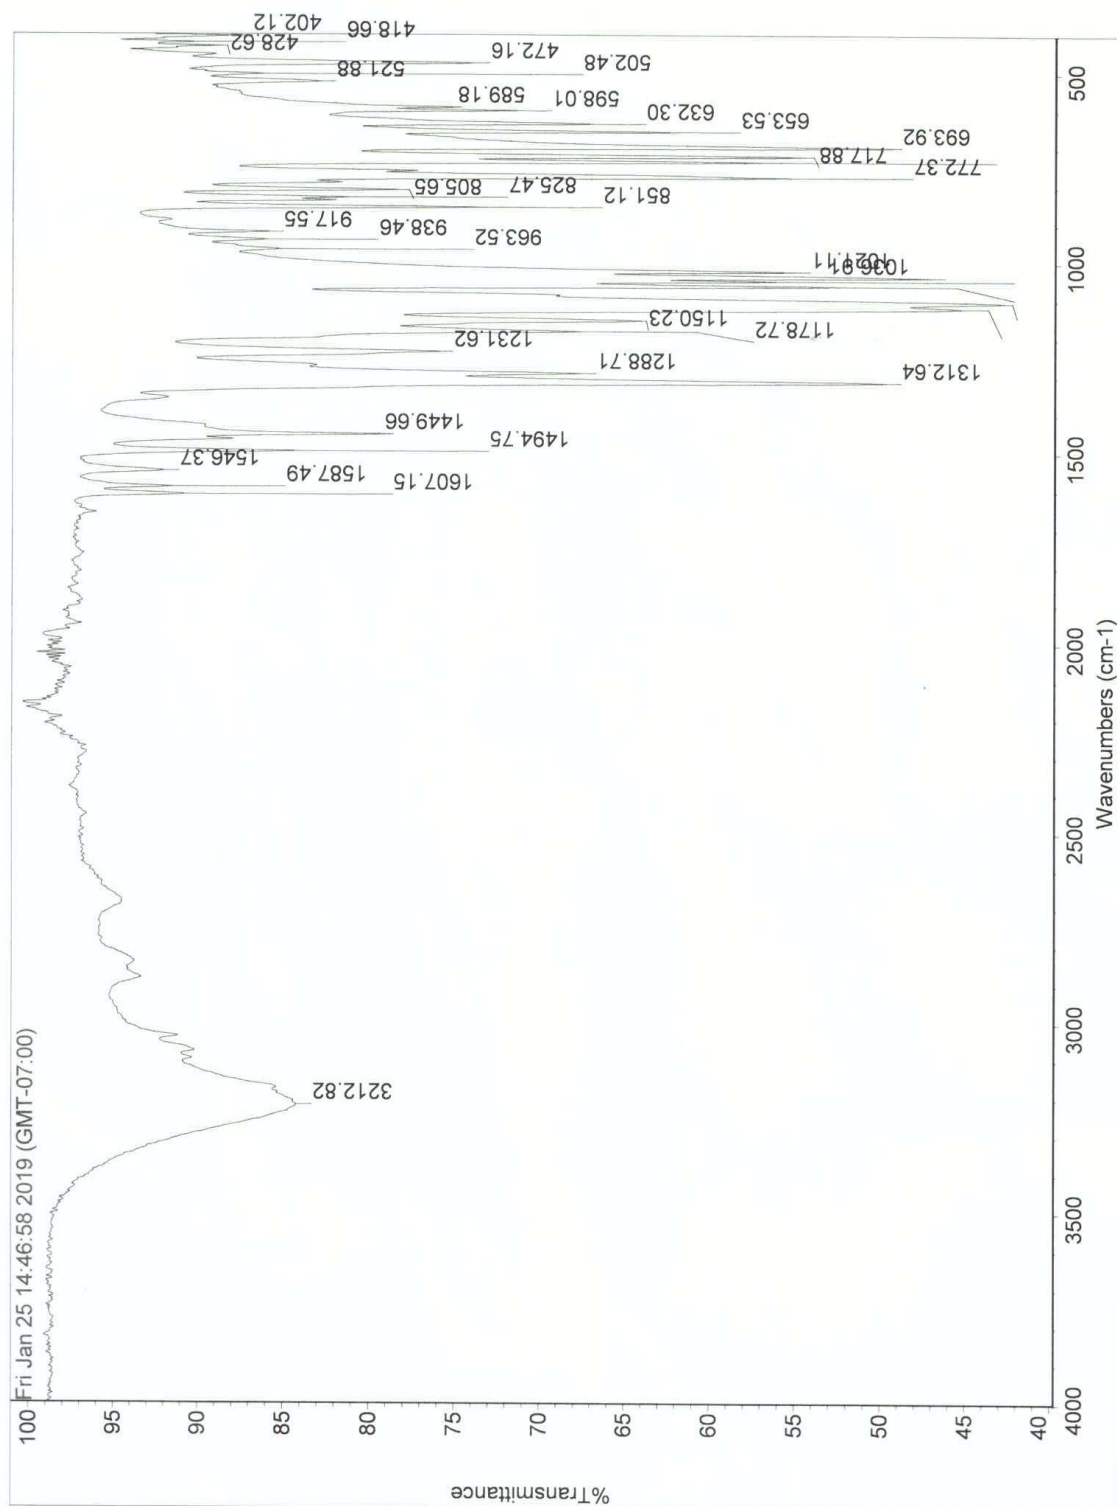



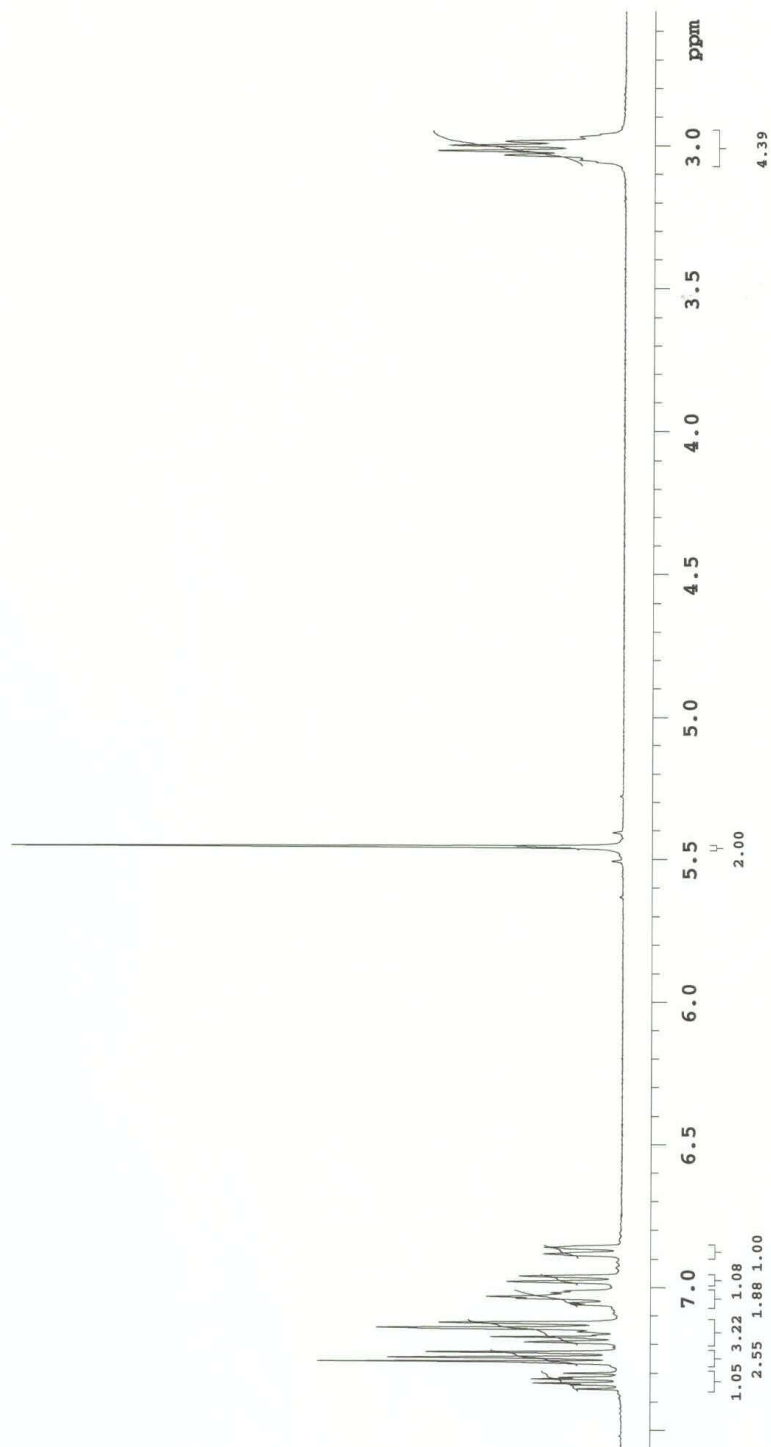

|                                                                                                                                   |                                |                                                                 |                                                                                                                  |
|-----------------------------------------------------------------------------------------------------------------------------------|--------------------------------|-----------------------------------------------------------------|------------------------------------------------------------------------------------------------------------------|
| <b>PULSE SEQUENCE</b><br>Relax. delay 1.000 sec<br>Pulse 45.0 degrees<br>Acq. time 2.561 sec<br>Width 6398.0 Hz<br>32 repetitions | <b>OBSERVE</b> H1, 399.9180599 | <b>DATA PROCESSING</b><br>Ft size 32768<br>Total time 1 minutes | <b>compd 6</b><br><br>Solvent: cdcl3<br>Temp. 25.0 C / 298.1 K<br>Operator: chem337<br>Mercury-400 "Agilent-NMR" |
|-----------------------------------------------------------------------------------------------------------------------------------|--------------------------------|-----------------------------------------------------------------|------------------------------------------------------------------------------------------------------------------|

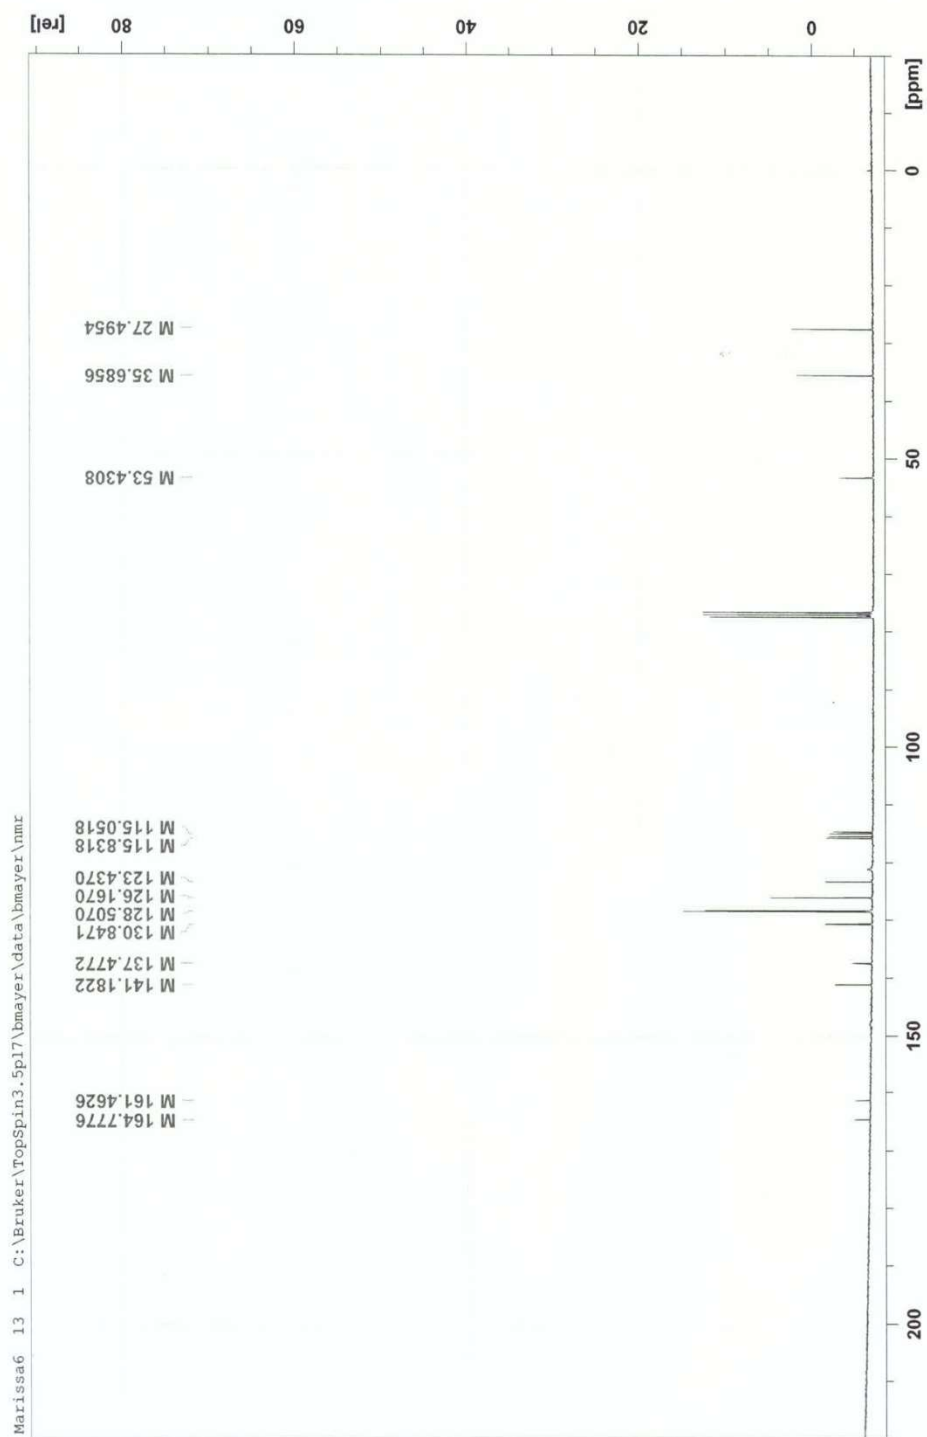

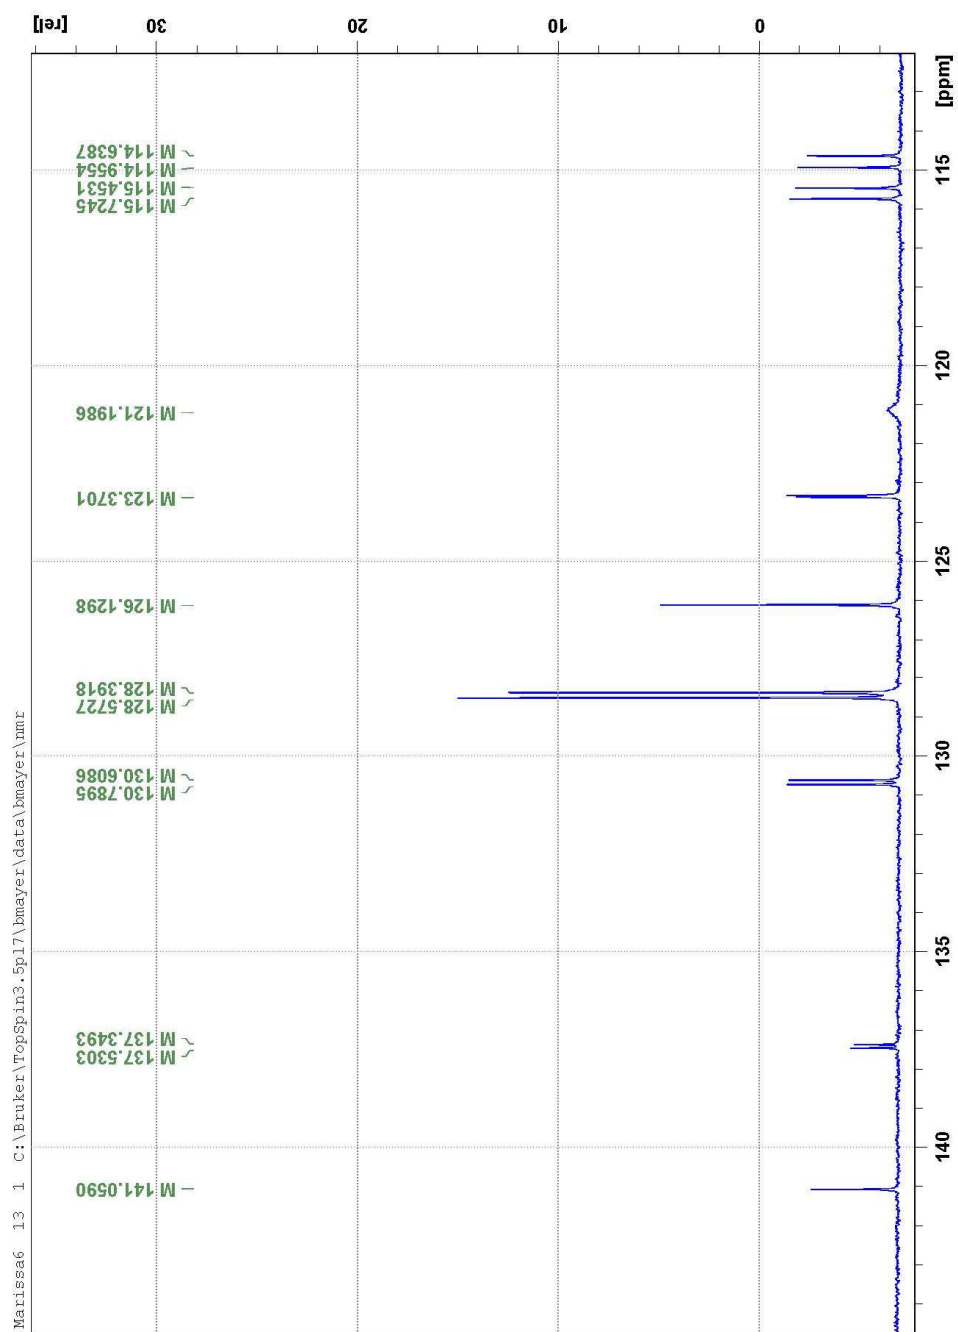

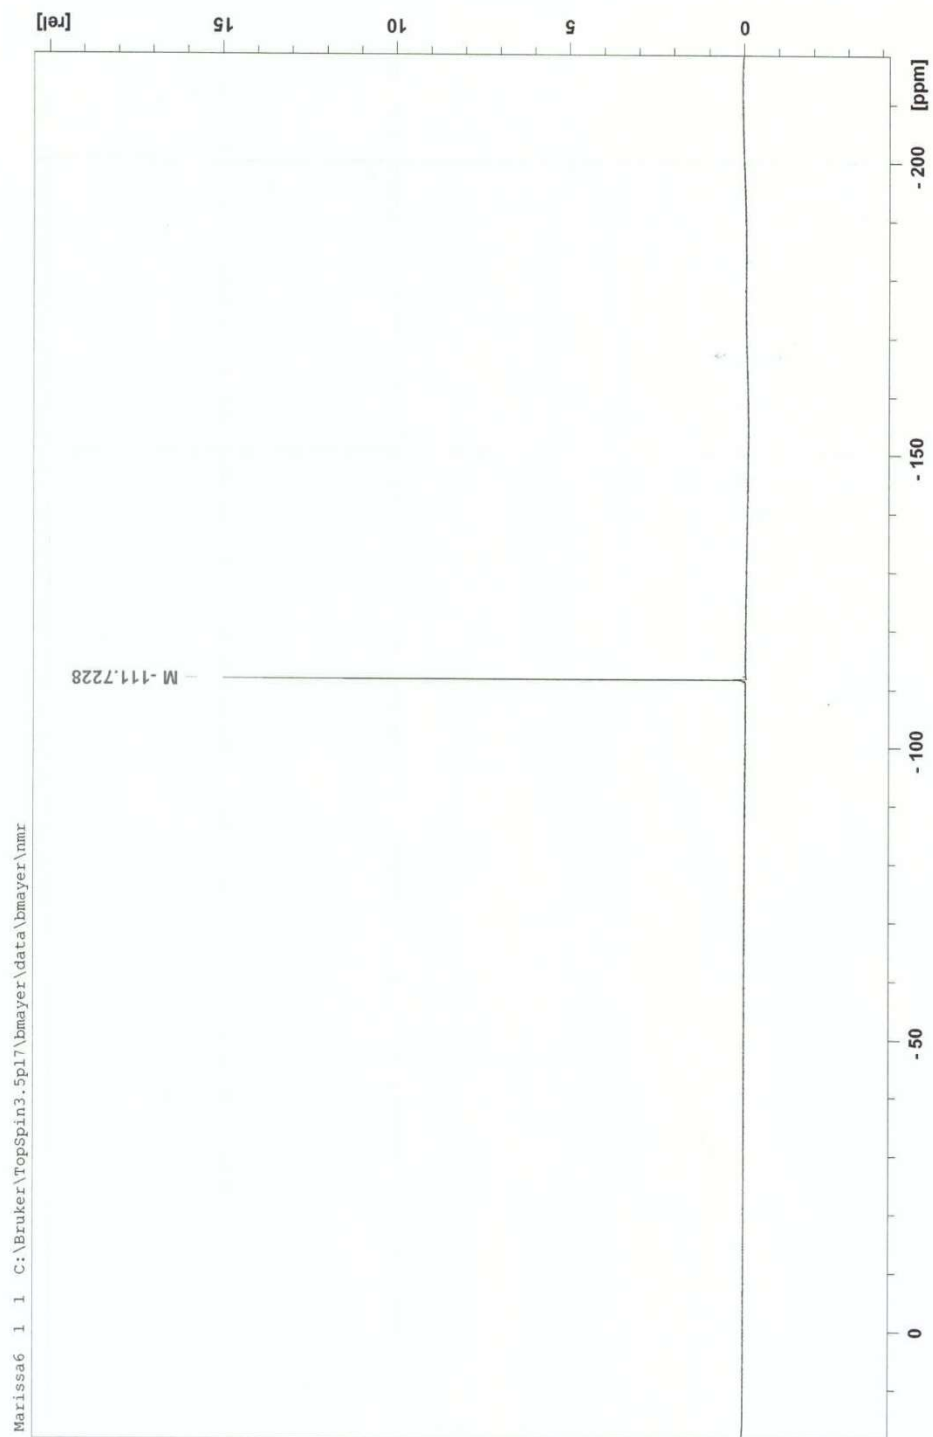

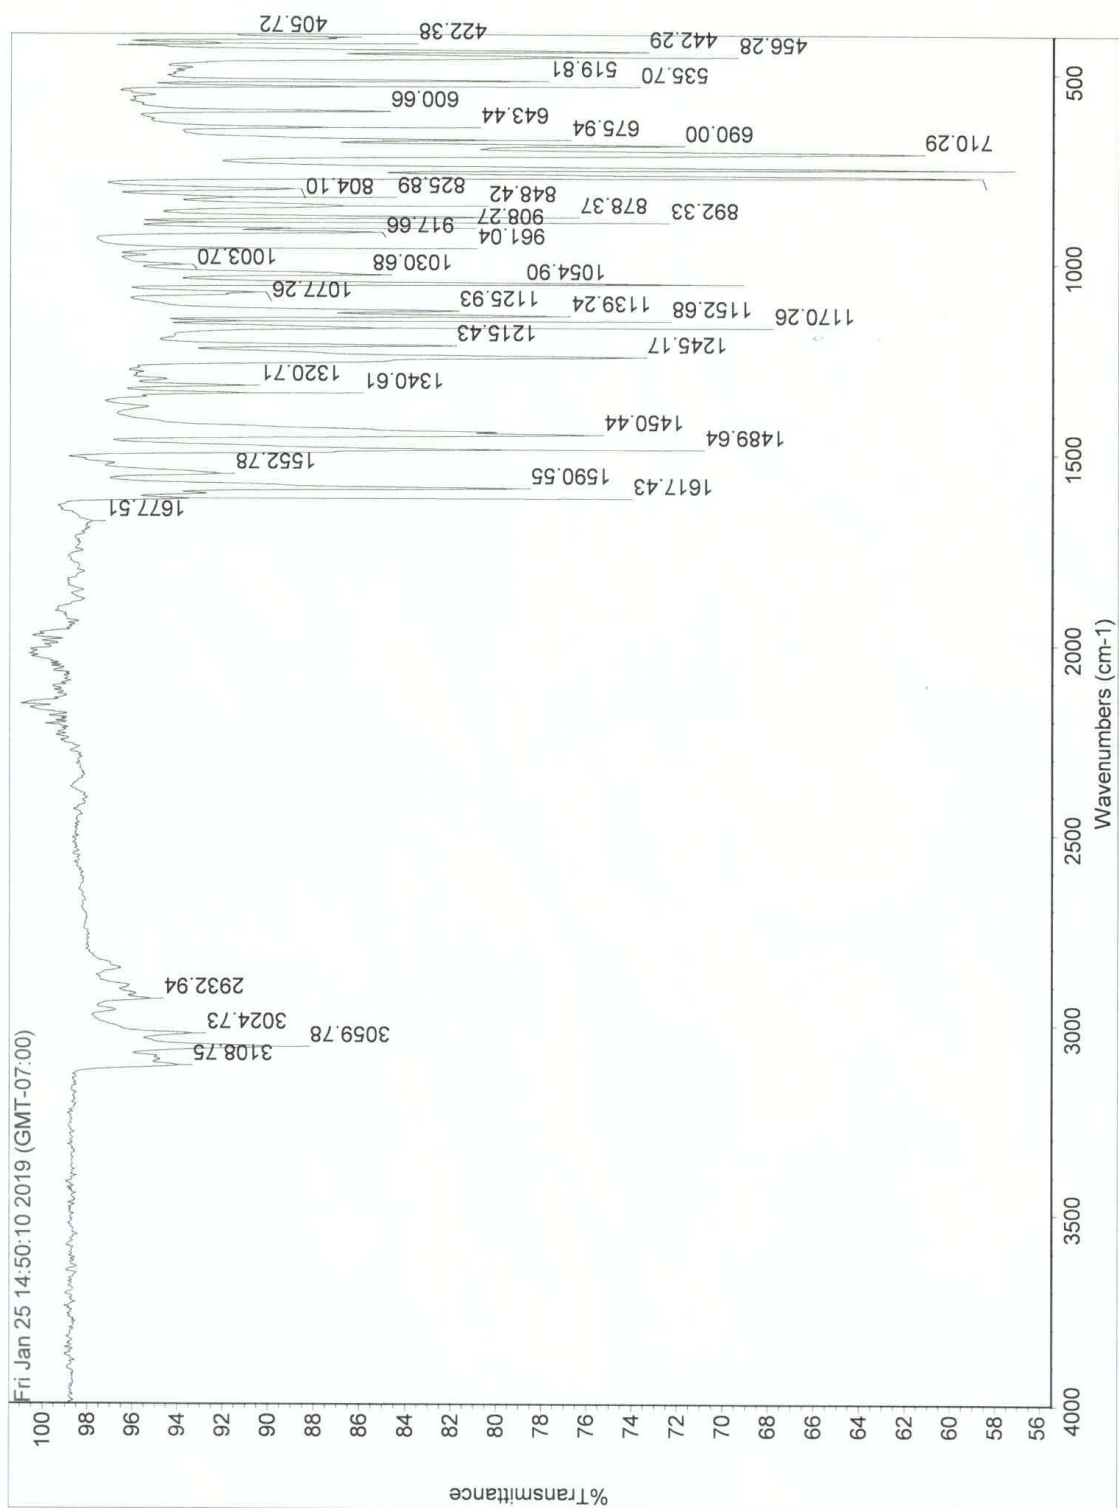

FTIR spectrum of 6

$^1\text{H}$  NMR spectrum of 7

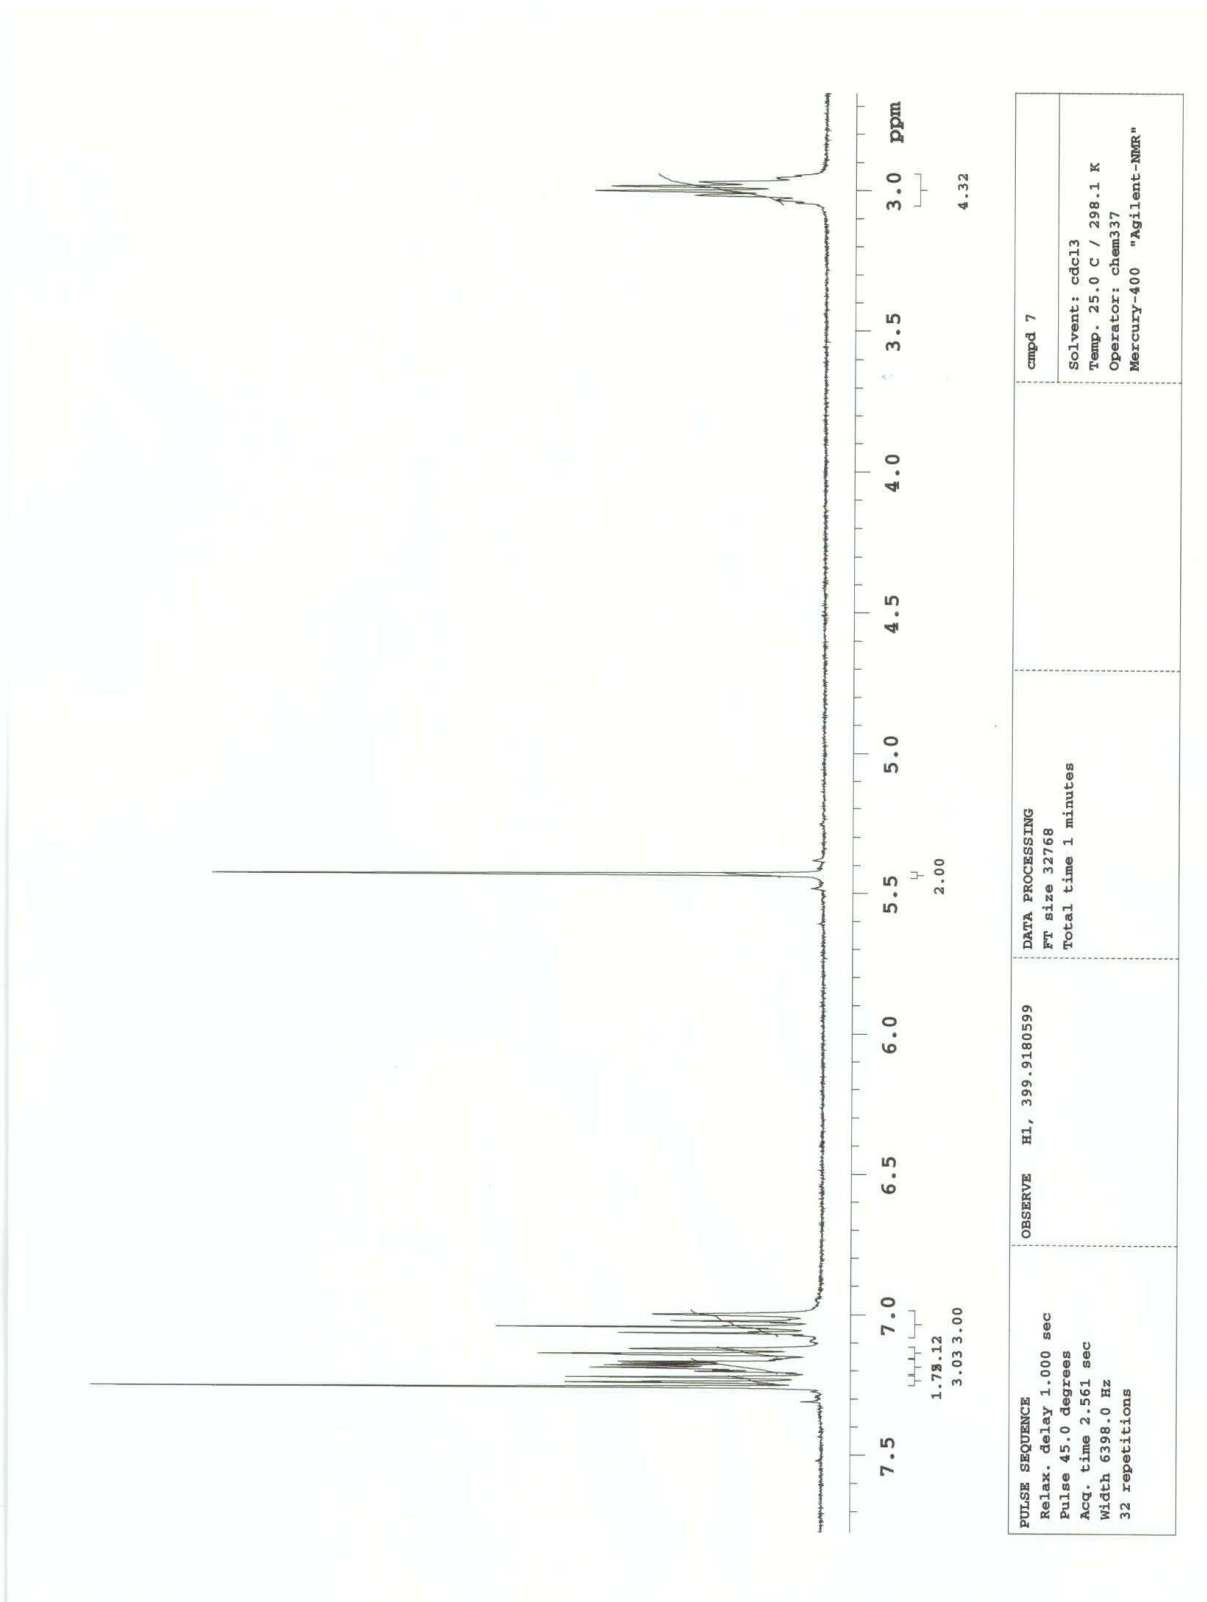

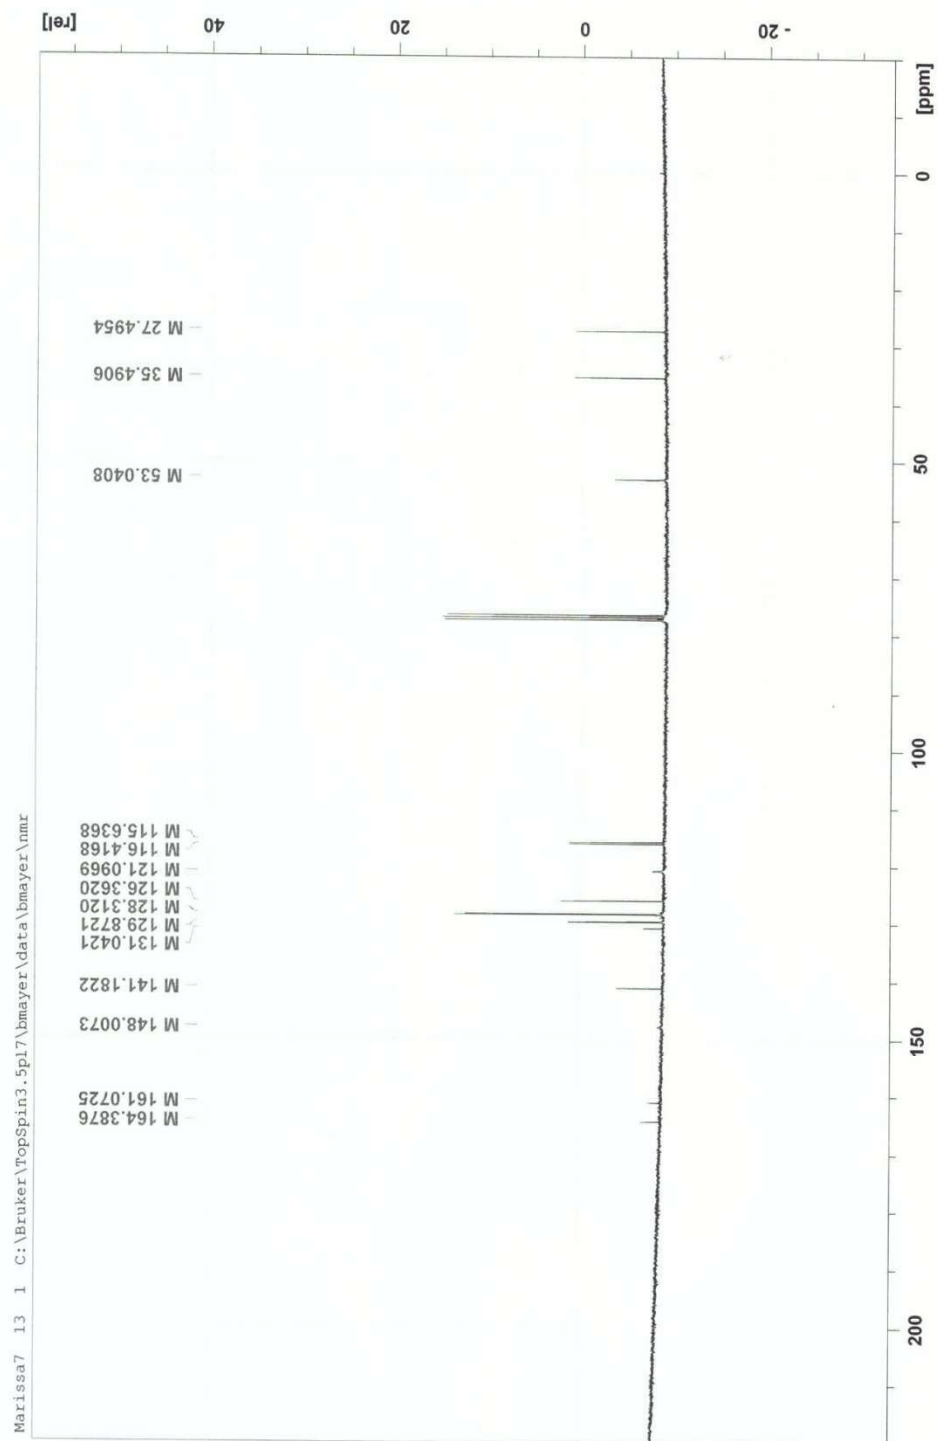

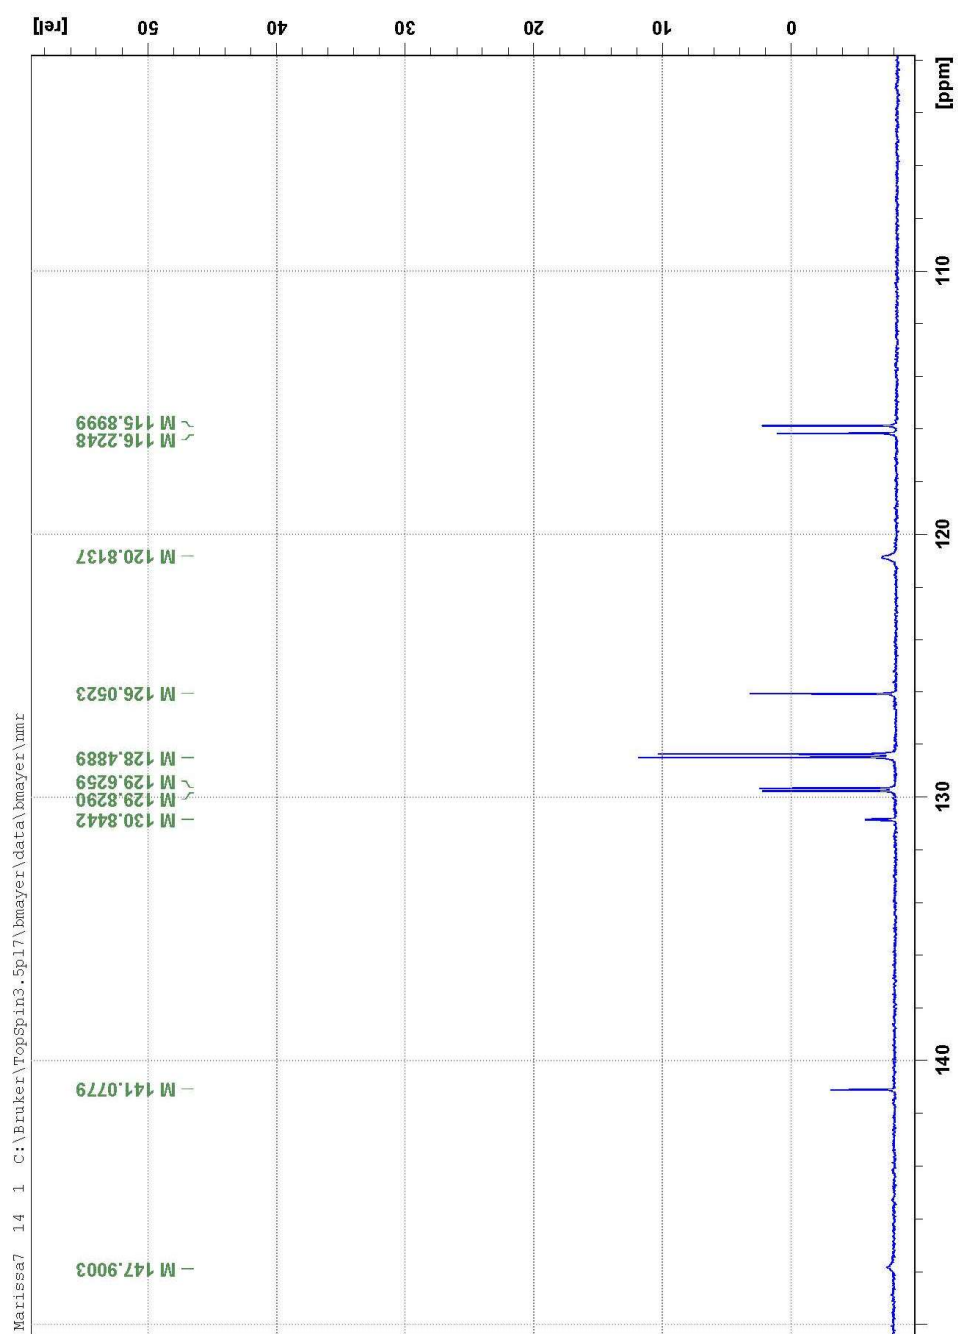



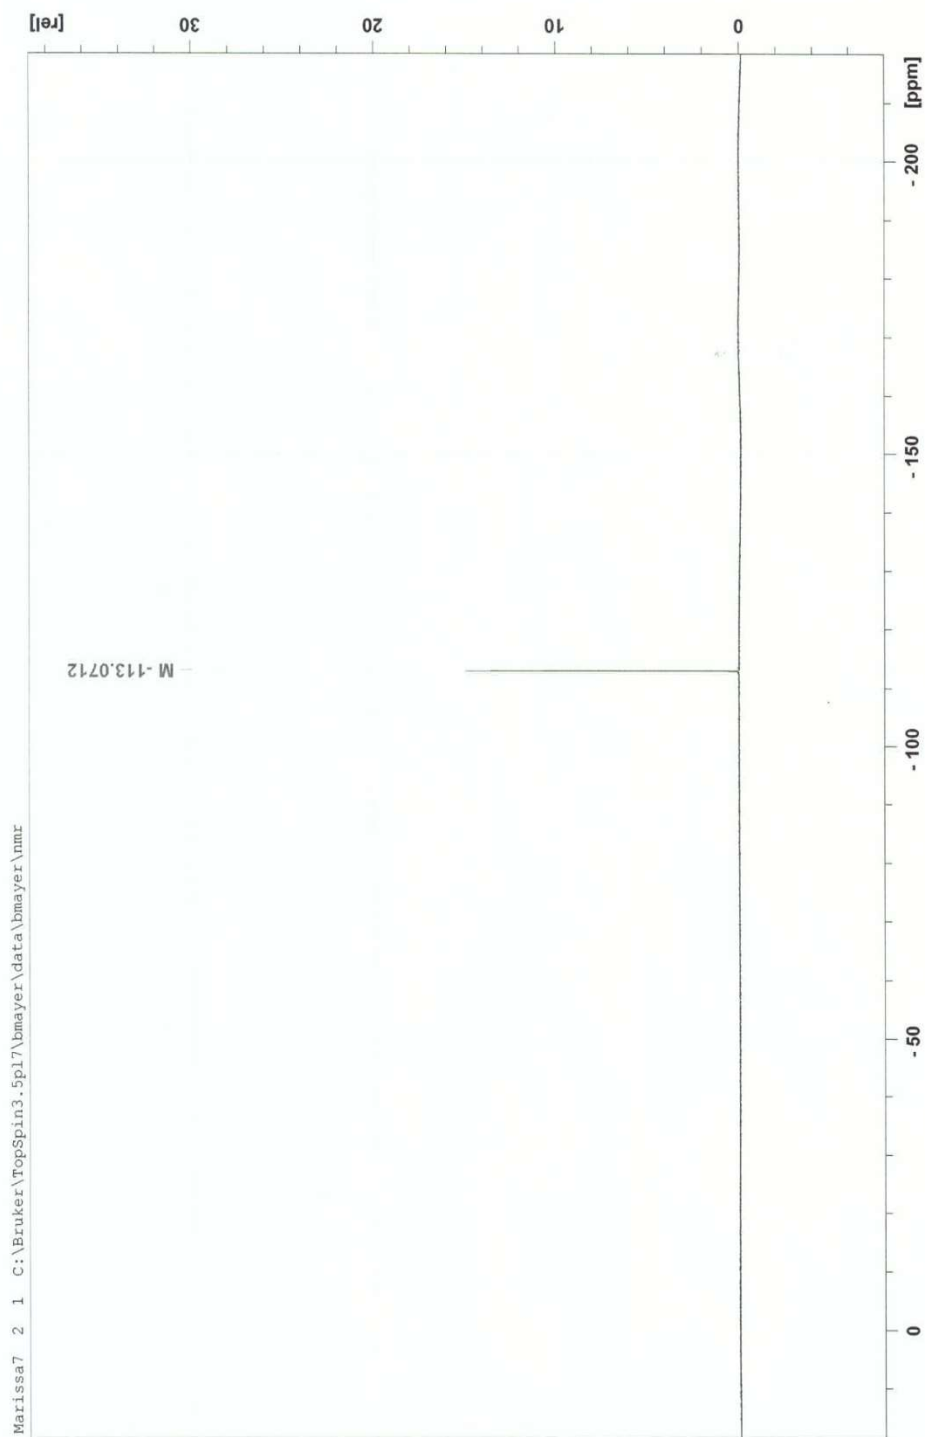

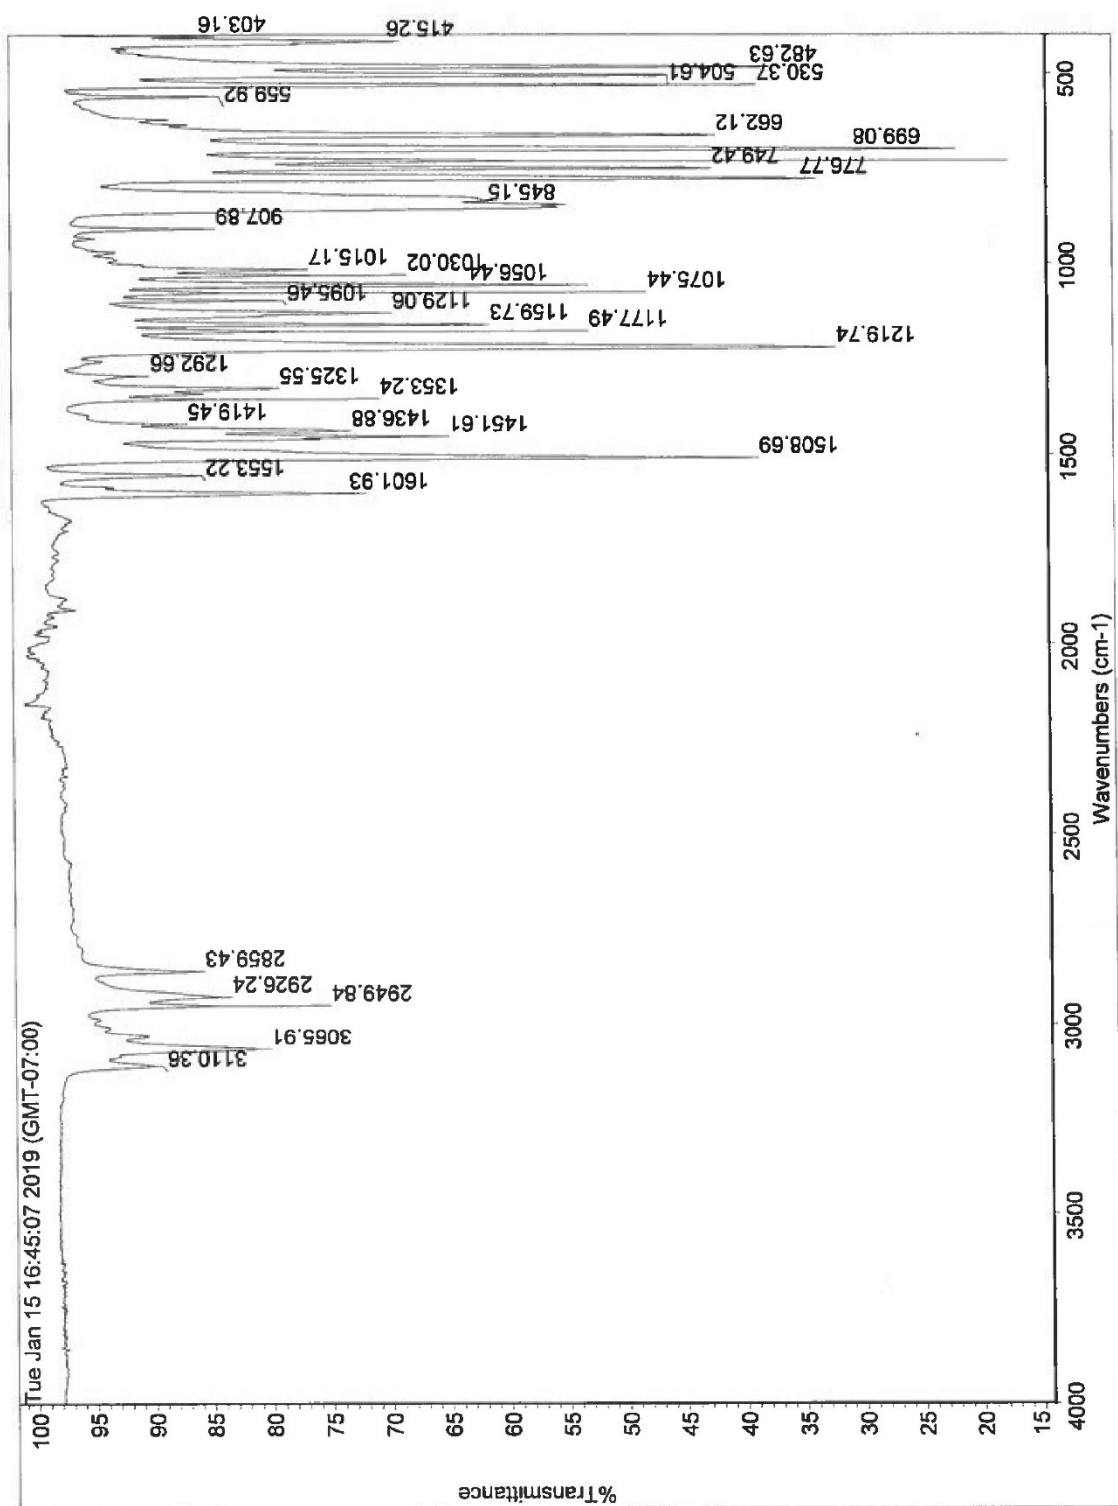

FTIR spectrum of 7

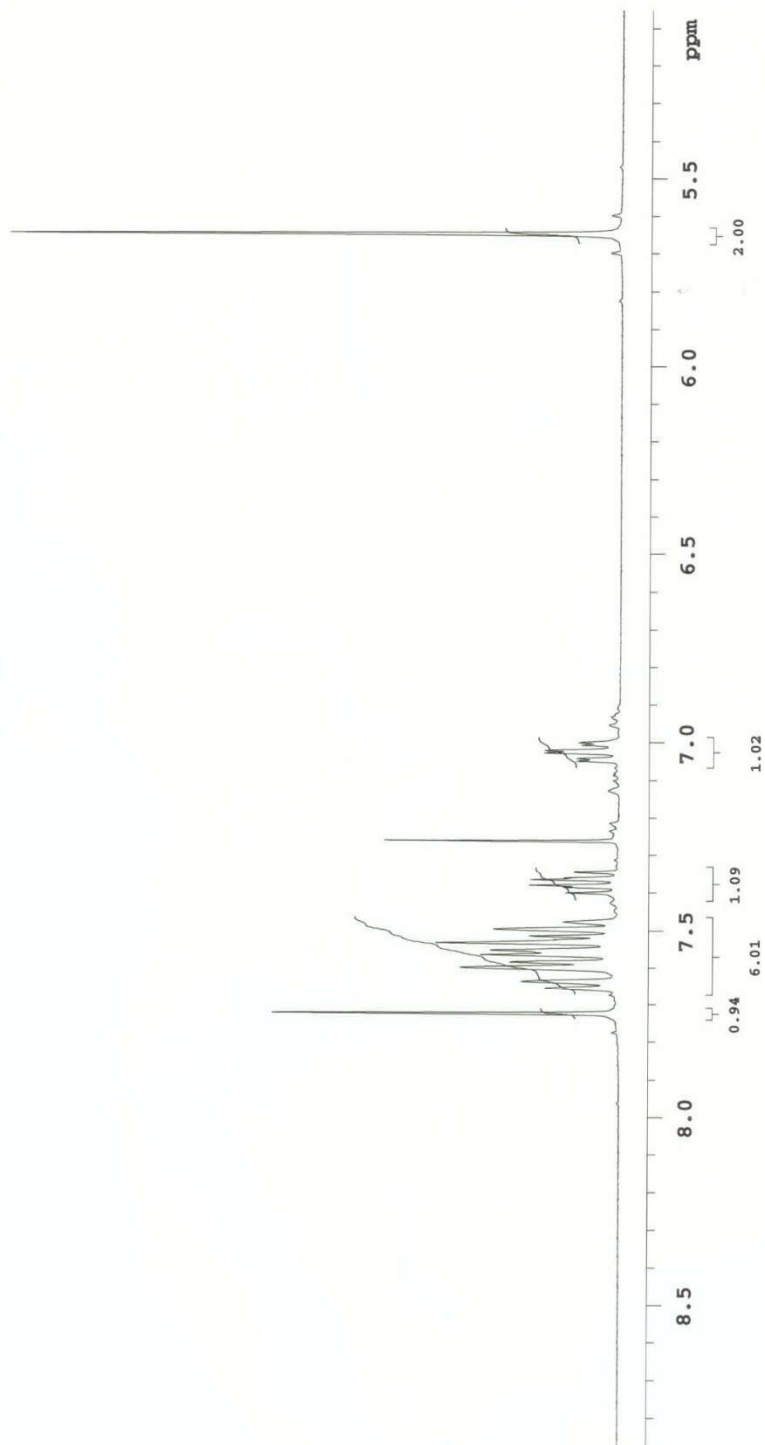

|                                                                                                                                                       |                                |                                                                         |                                                                                                                              |
|-------------------------------------------------------------------------------------------------------------------------------------------------------|--------------------------------|-------------------------------------------------------------------------|------------------------------------------------------------------------------------------------------------------------------|
| <p>PULSE SEQUENCE</p> <p>Relax. delay 1.000 sec</p> <p>Pulse 45.0 degrees</p> <p>Acq. time 2.561 sec</p> <p>Width 6398.0 Hz</p> <p>32 repetitions</p> | <p>OBSERVE H1, 399.9180591</p> | <p>DATA PROCESSING</p> <p>Ft size 32768</p> <p>Total time 1 minutes</p> | <p>compd 8</p> <p>Solvent: cdcl3</p> <p>Temp. 25.0 C / 298.1 K</p> <p>Operator: chem337</p> <p>Mercury-400 "Agilent-NMR"</p> |
|-------------------------------------------------------------------------------------------------------------------------------------------------------|--------------------------------|-------------------------------------------------------------------------|------------------------------------------------------------------------------------------------------------------------------|

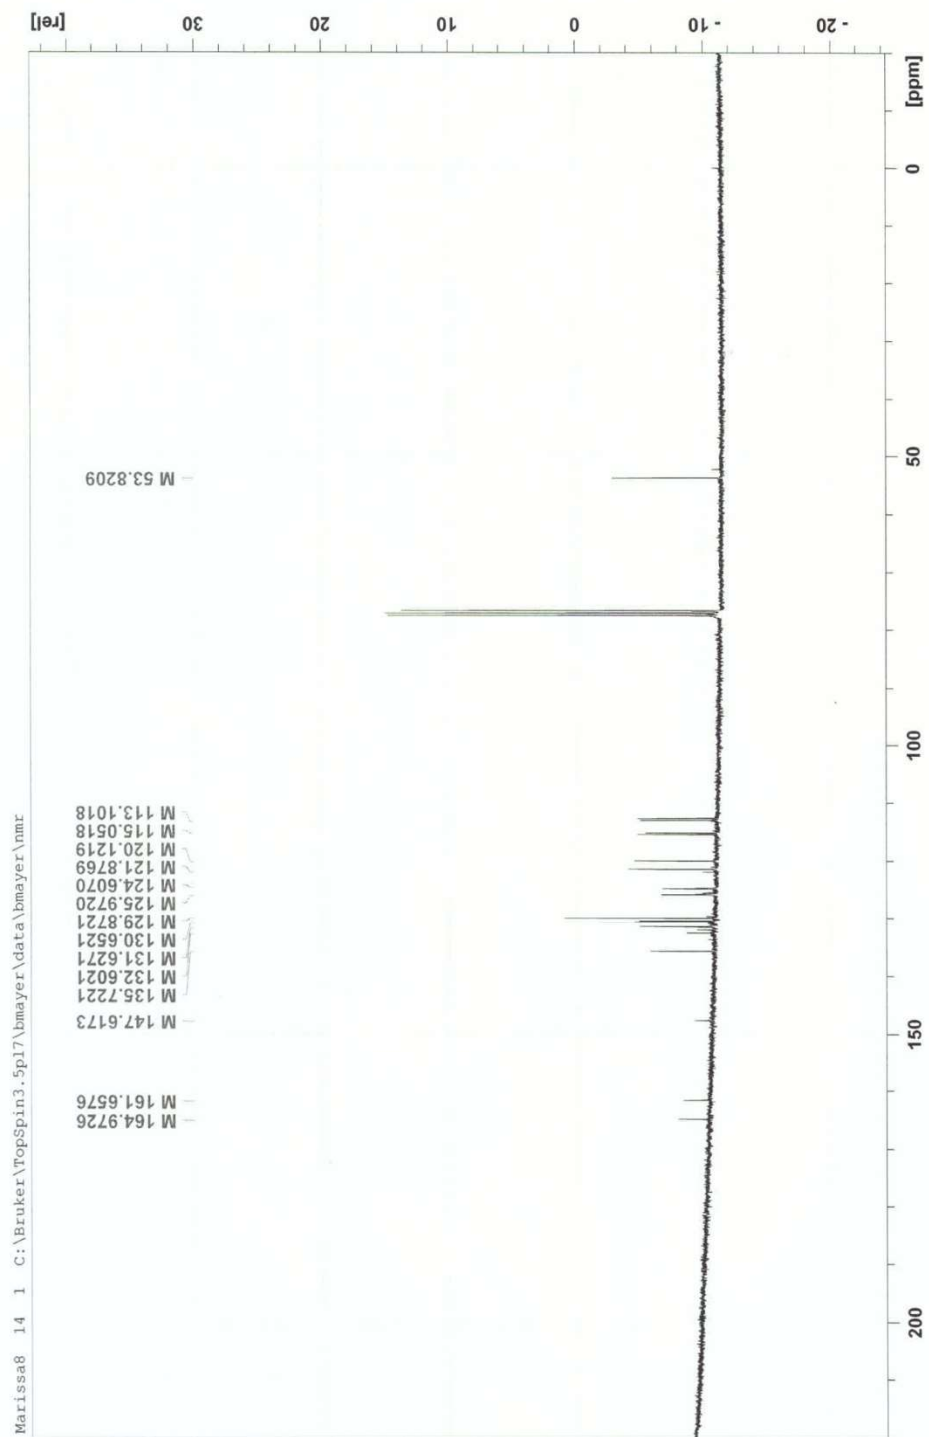

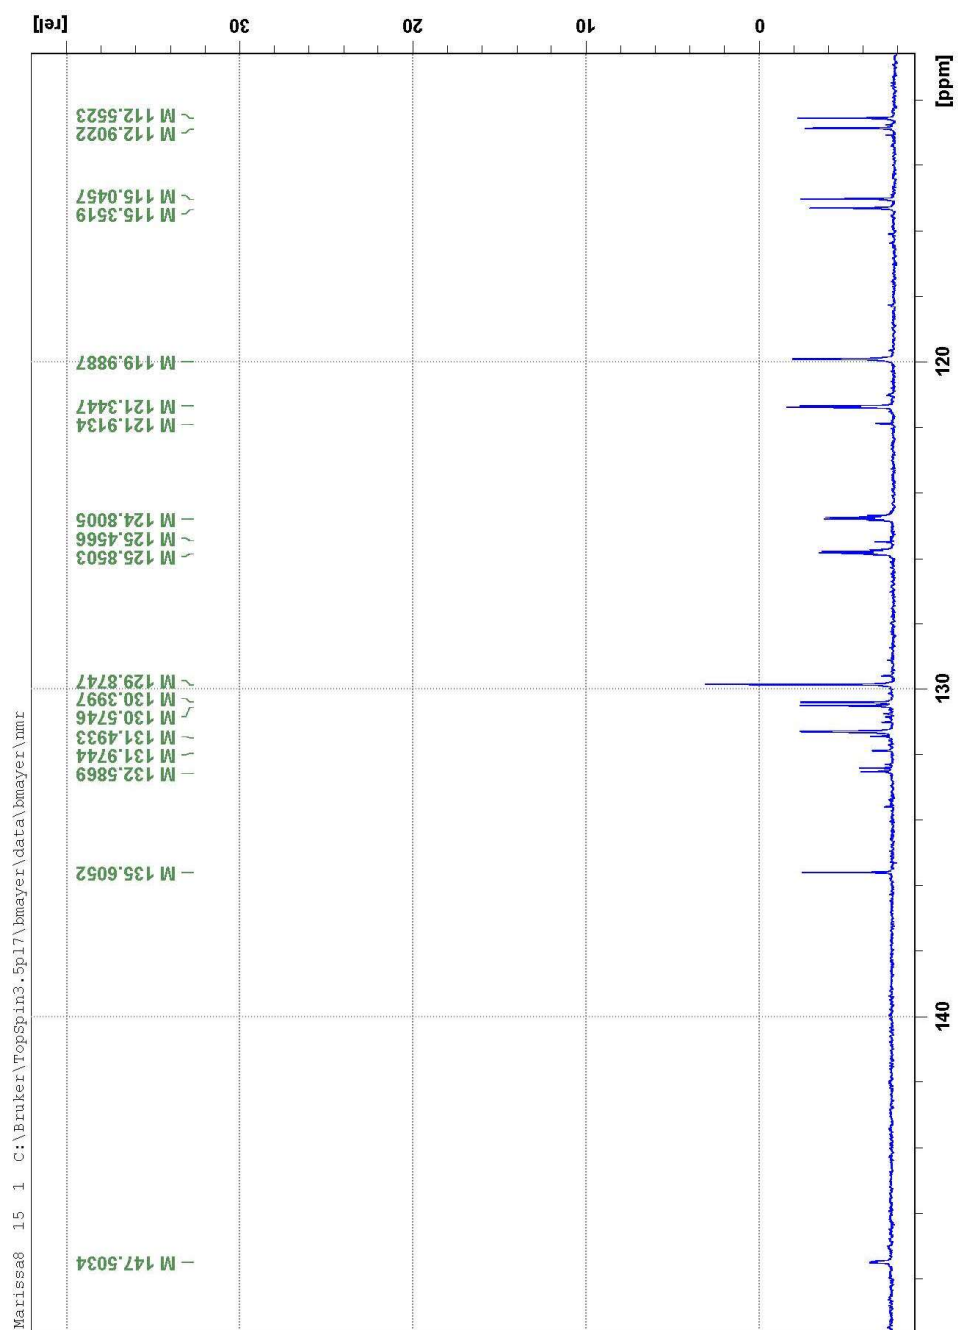

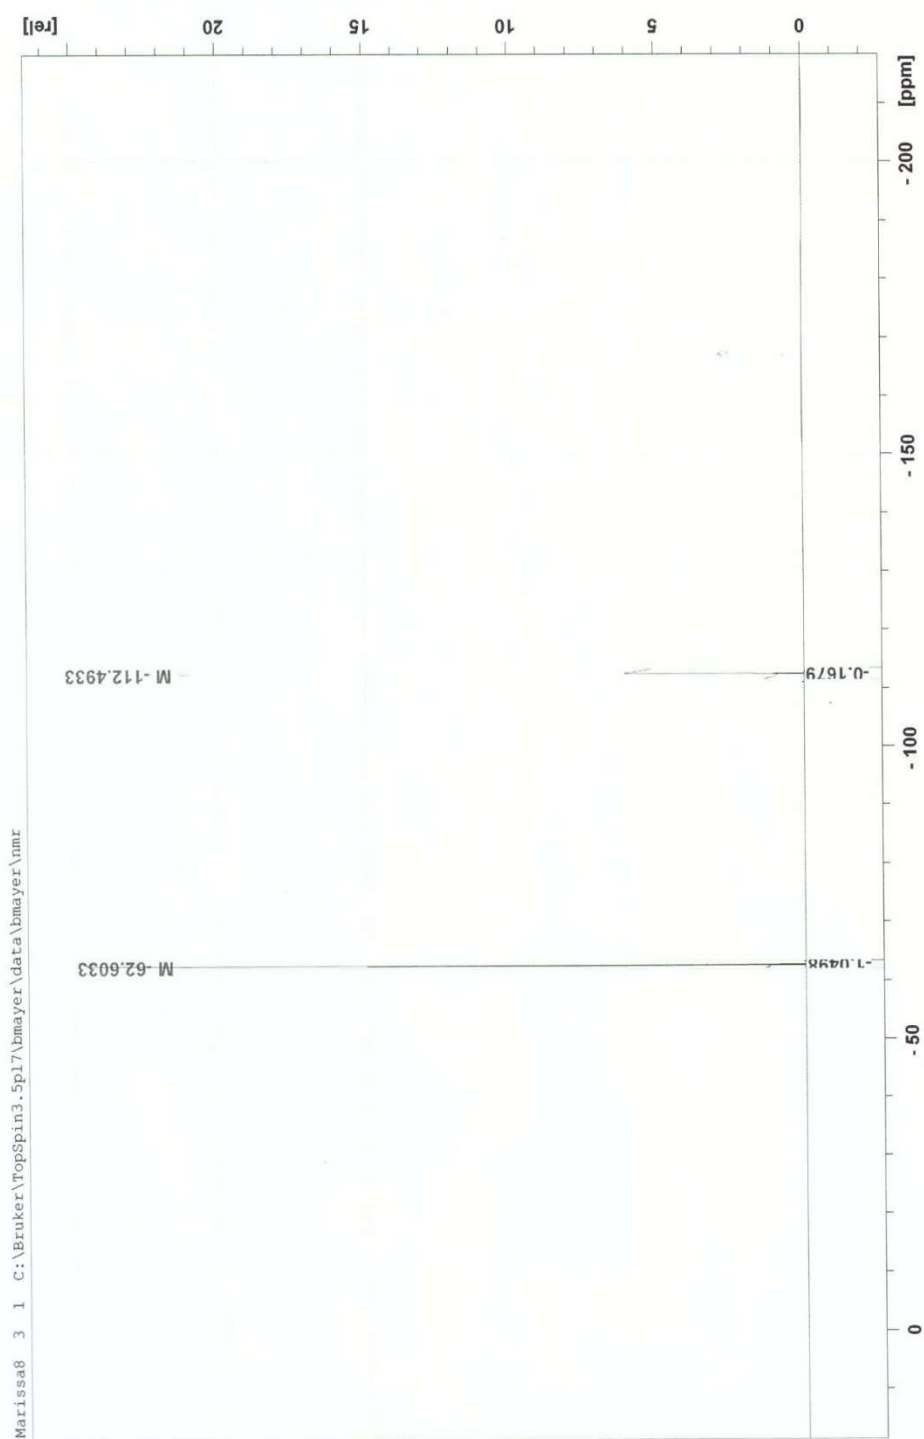

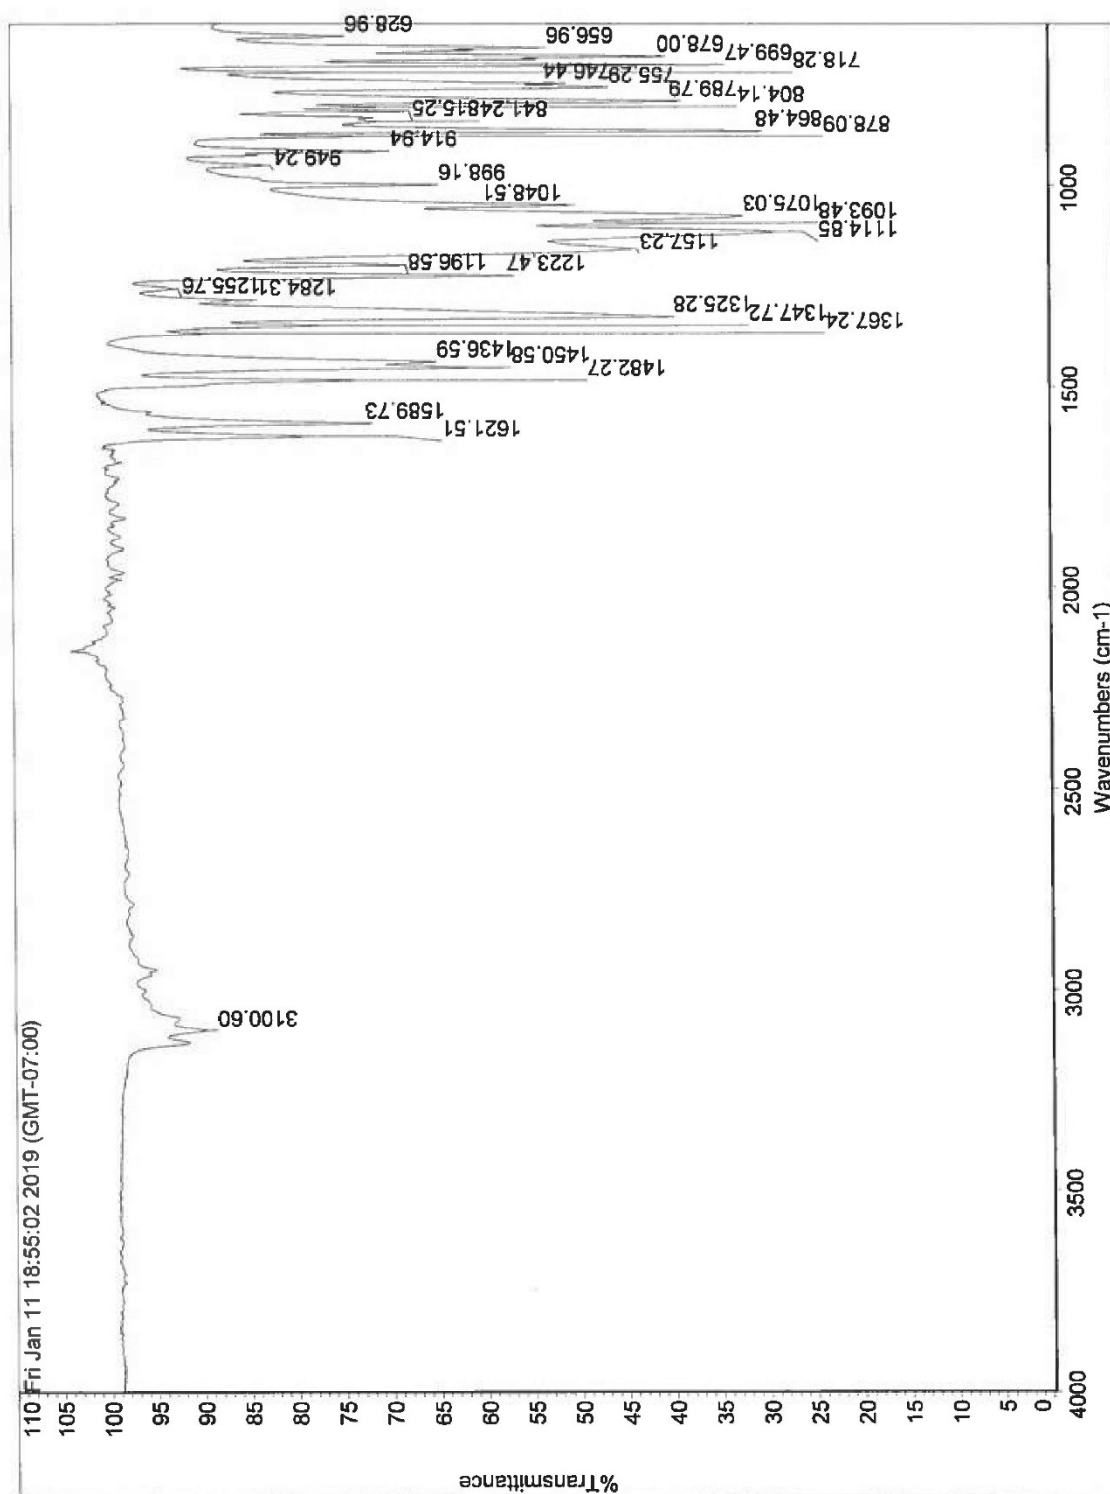

FTIR spectrum of 8





S-41

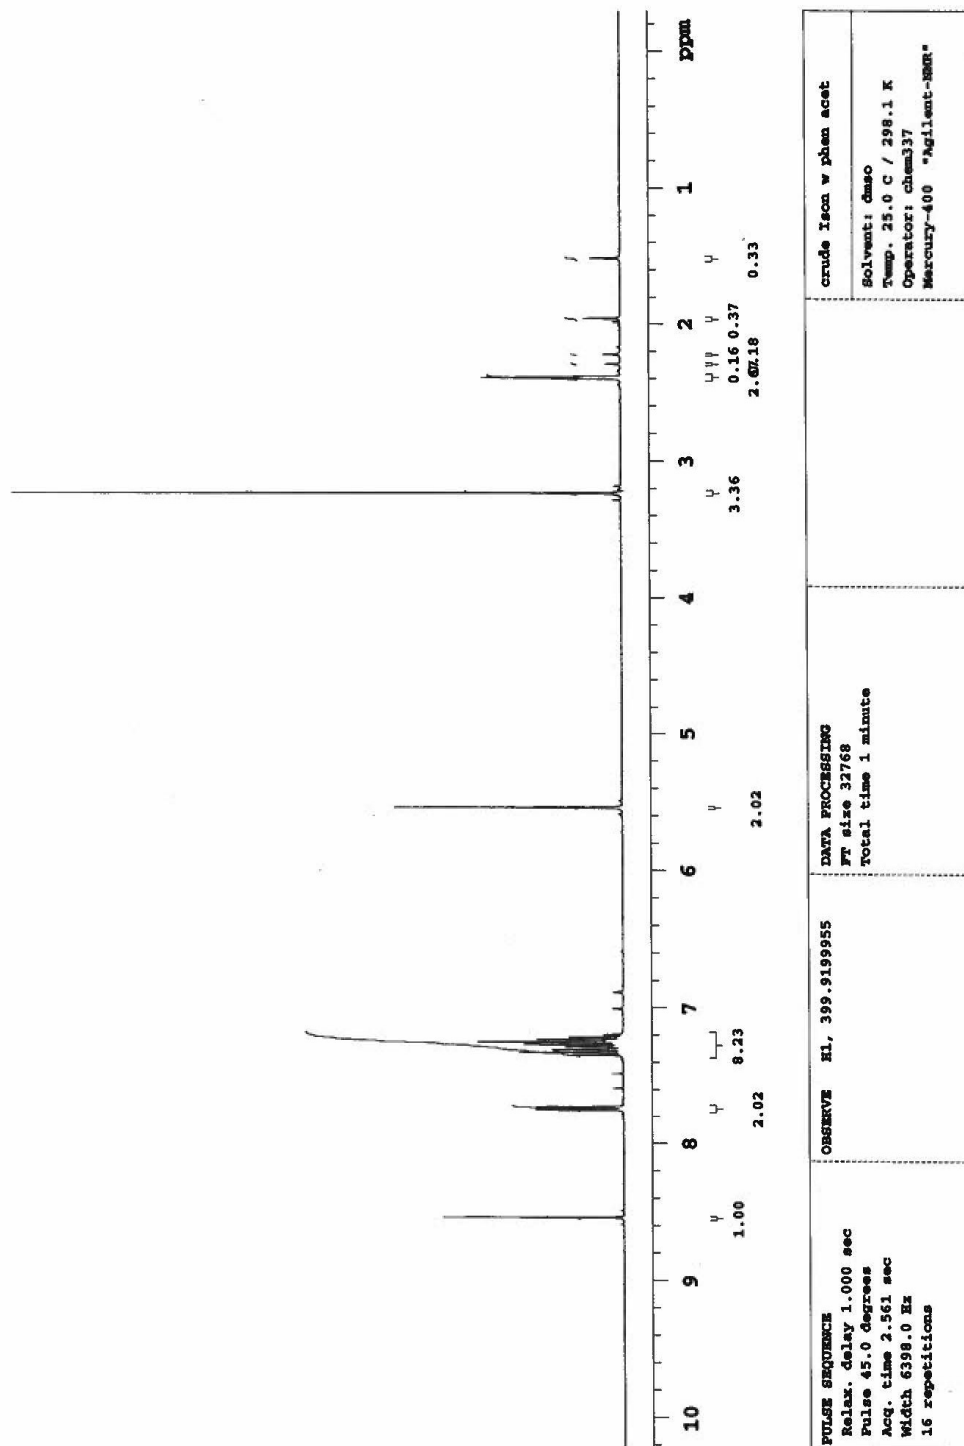

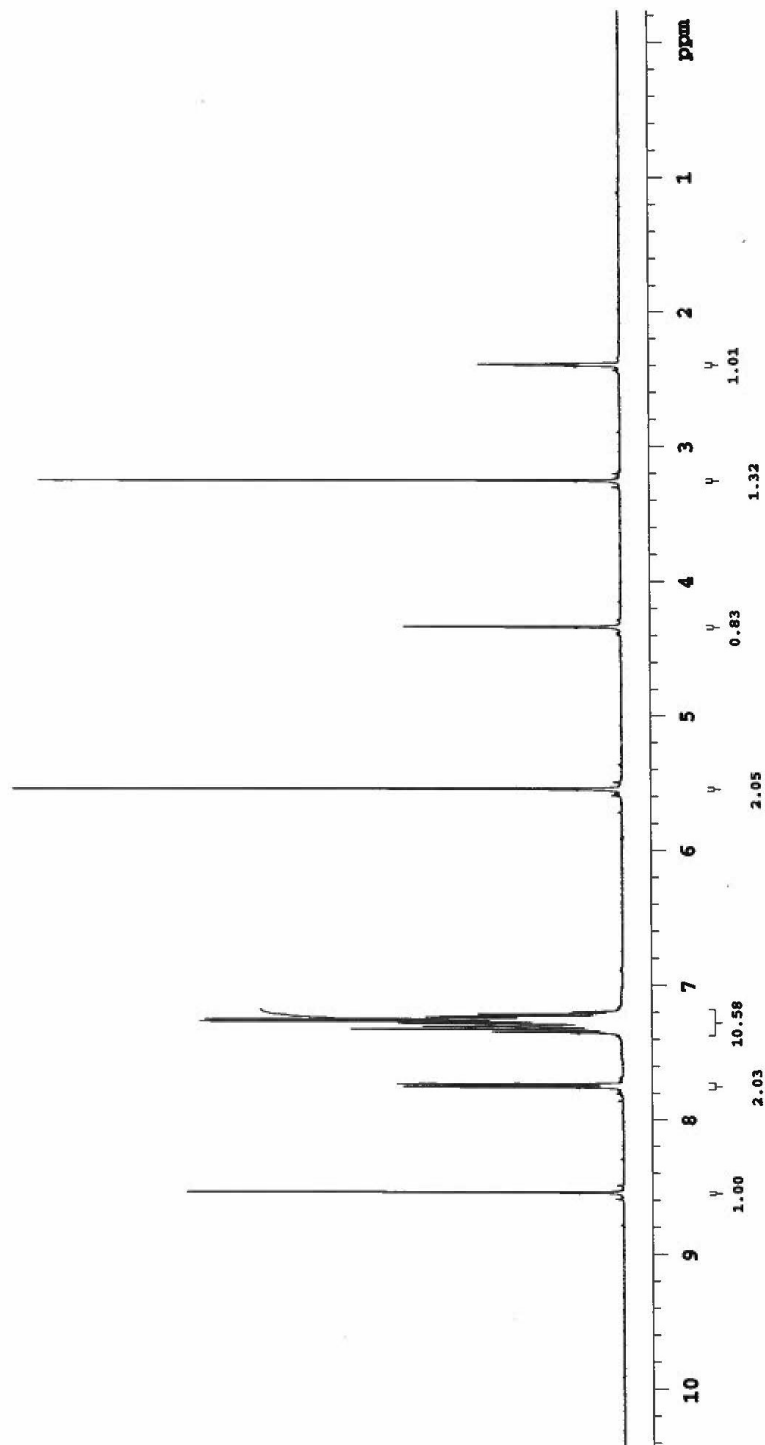

|                                                                                                                                   |                                |                                                                |                                                                                                                      |
|-----------------------------------------------------------------------------------------------------------------------------------|--------------------------------|----------------------------------------------------------------|----------------------------------------------------------------------------------------------------------------------|
| <b>PULSE SEQUENCE</b><br>Relax. delay 1.000 sec<br>Pulse 45.0 degrees<br>Acq. time 2.561 sec<br>Width 6396.0 Hz<br>16 repetitions | <b>OBSERVE</b> H1, 399.9199955 | <b>DATA PROCESSING</b><br>FT size 32768<br>Total time 1 minute | crude conv. w phen acet<br>Solvent: dmsd<br>Temp. 25.0 C / 298.1 K<br>Operator: chem337<br>Mercury-400 "Agilent-NMR" |
|-----------------------------------------------------------------------------------------------------------------------------------|--------------------------------|----------------------------------------------------------------|----------------------------------------------------------------------------------------------------------------------|

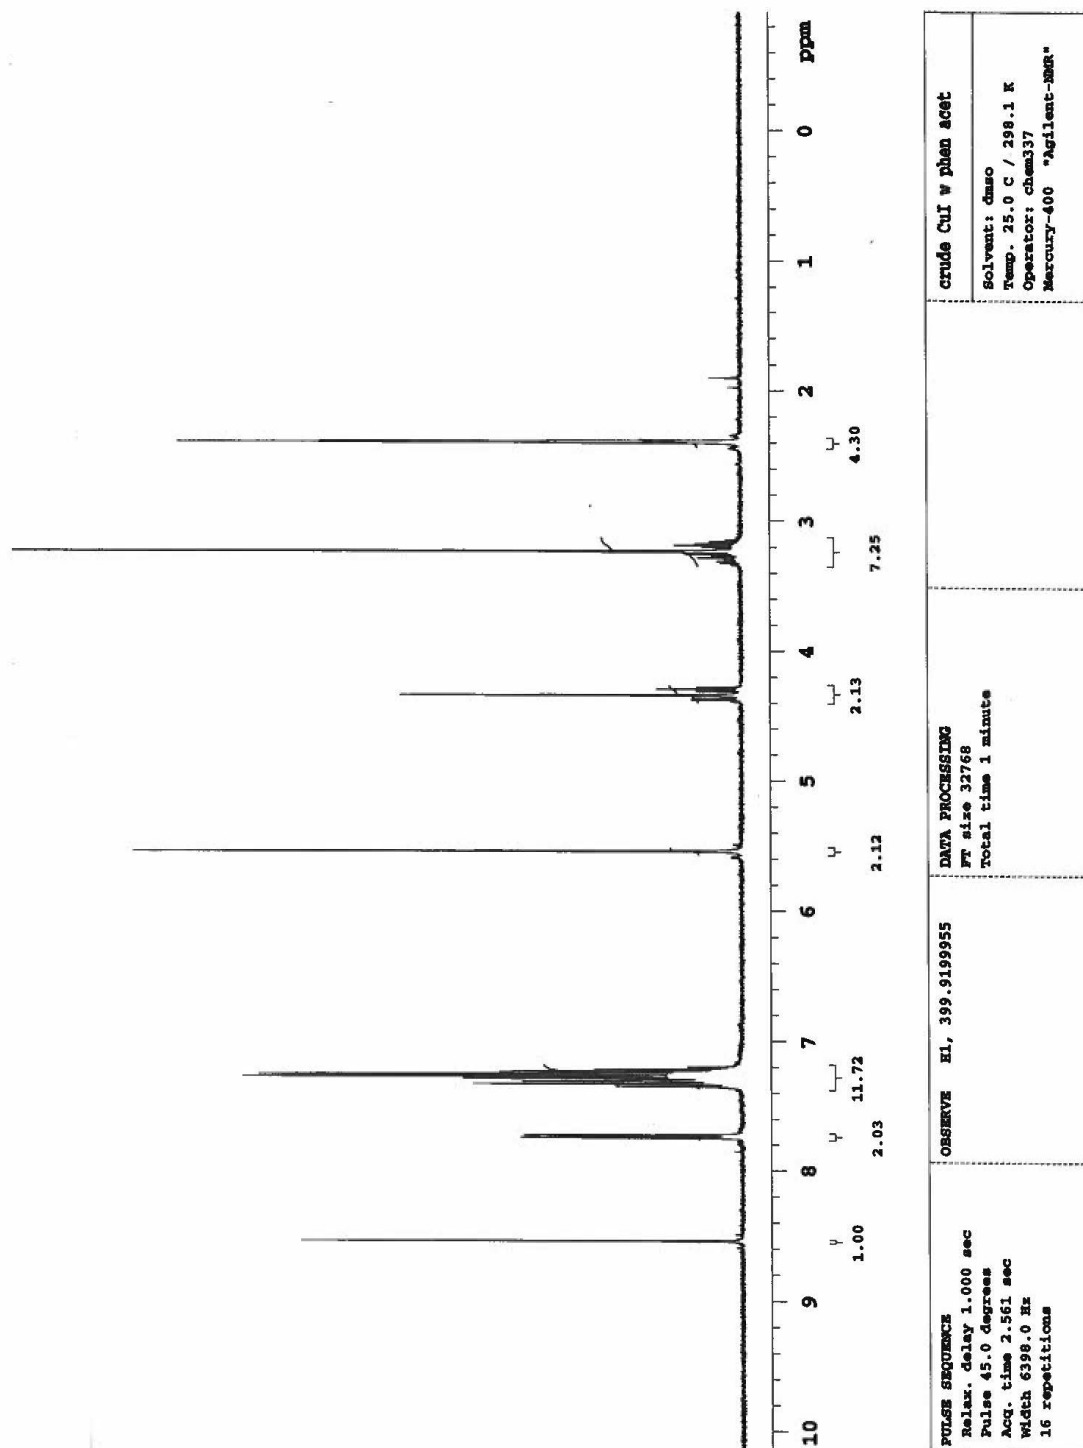

CuI in glycerol scale up of 1.

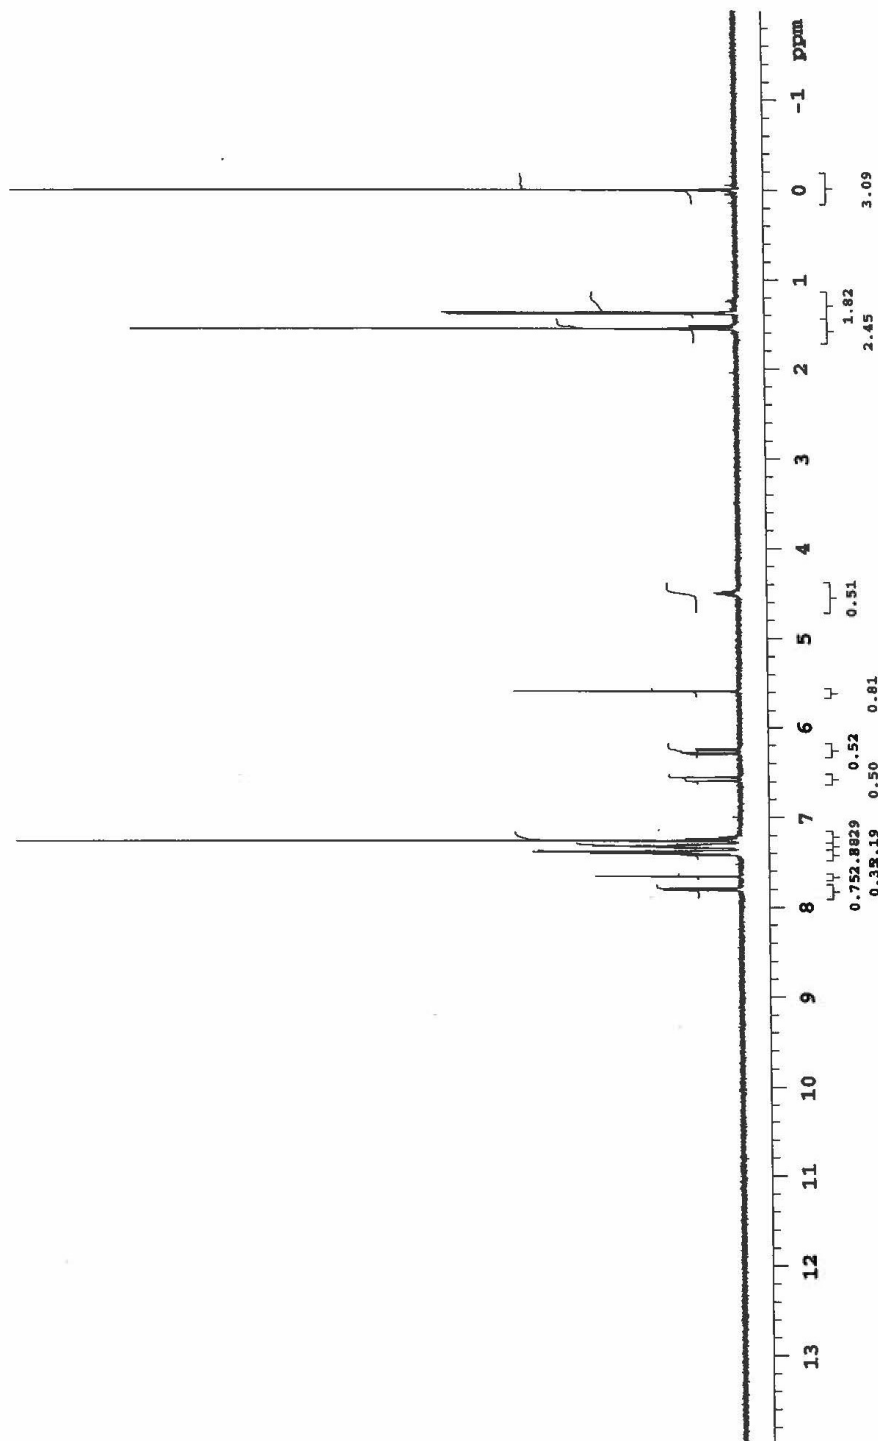

|                                                                                                                                   |                                |                                                                |                                                                                                                                                            |
|-----------------------------------------------------------------------------------------------------------------------------------|--------------------------------|----------------------------------------------------------------|------------------------------------------------------------------------------------------------------------------------------------------------------------|
| <b>PULSE SEQUENCE</b><br>Relax. delay 1.000 sec<br>Pulse 45.0 degrees<br>Acq. time 2.561 sec<br>Width 6398.0 Hz<br>16 repetitions | <b>OBSERVE</b> HL, 399.9180595 | <b>DATA PROCESSING</b><br>FT size 32768<br>Total time 1 minute | red amination of<br>2-ethoxybenzaldehyde w<br>piperidine<br><br>Solvent: cdcl3<br>Temp. 25.0 C / 298.1 K<br>Operator: chem337<br>Mercury-400 "Agilent-MMR" |
|-----------------------------------------------------------------------------------------------------------------------------------|--------------------------------|----------------------------------------------------------------|------------------------------------------------------------------------------------------------------------------------------------------------------------|

Solvent-free product **1** from equimolar reactants.

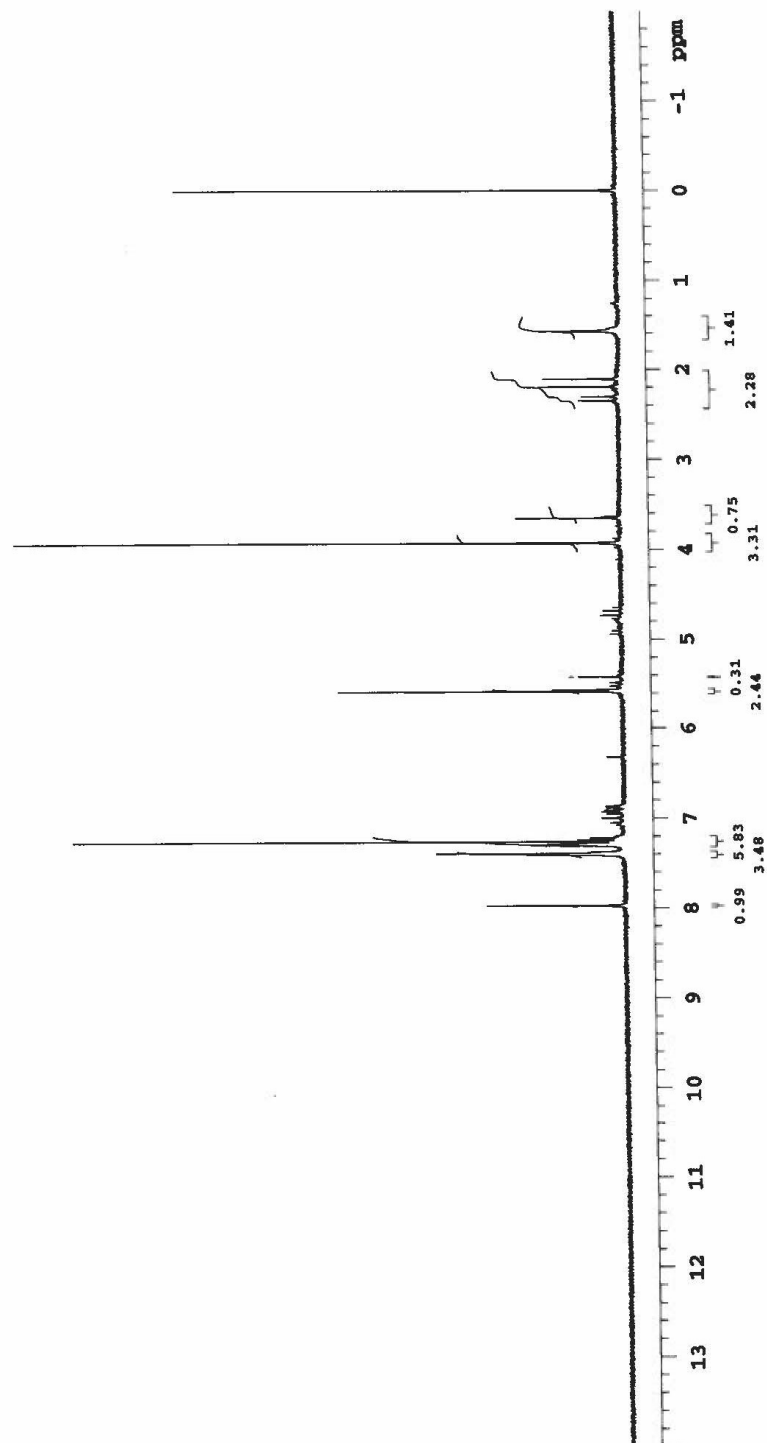

|                                                                                                                                   |                                |                                                                |                                                                                                                                           |
|-----------------------------------------------------------------------------------------------------------------------------------|--------------------------------|----------------------------------------------------------------|-------------------------------------------------------------------------------------------------------------------------------------------|
| <b>PULSE SEQUENCE</b><br>Relax. delay 1.000 sec<br>Pulse 45.0 degrees<br>Acq. time 2.561 sec<br>Width 6398.0 Hz<br>16 repetitions | <b>OBSERVE</b> H1, 399.9180591 | <b>DATA PROCESSING</b><br>F1 size 32768<br>Total time 1 minute | <b>propargylation of bromoquinoline</b><br><br>Solvent: cdcl3<br>Temp. 25.0 C / 298.1 K<br>Operator: chem337<br>Mercury-400 "Agilent-NMR" |
|-----------------------------------------------------------------------------------------------------------------------------------|--------------------------------|----------------------------------------------------------------|-------------------------------------------------------------------------------------------------------------------------------------------|

Solvent-free product **2** from equimolar reactants.

3-butyn-1-ol, crude, conventional, azid limiting

Sample Name:

Data Collected on:

Agilent-NMR-mercury400

Archive directory:

Sample directory:

FidFile: PROTON

Pulse Sequence: PROTON (s2pul)

Solvent: cdcl3

Data collected on: Feb 23 2019

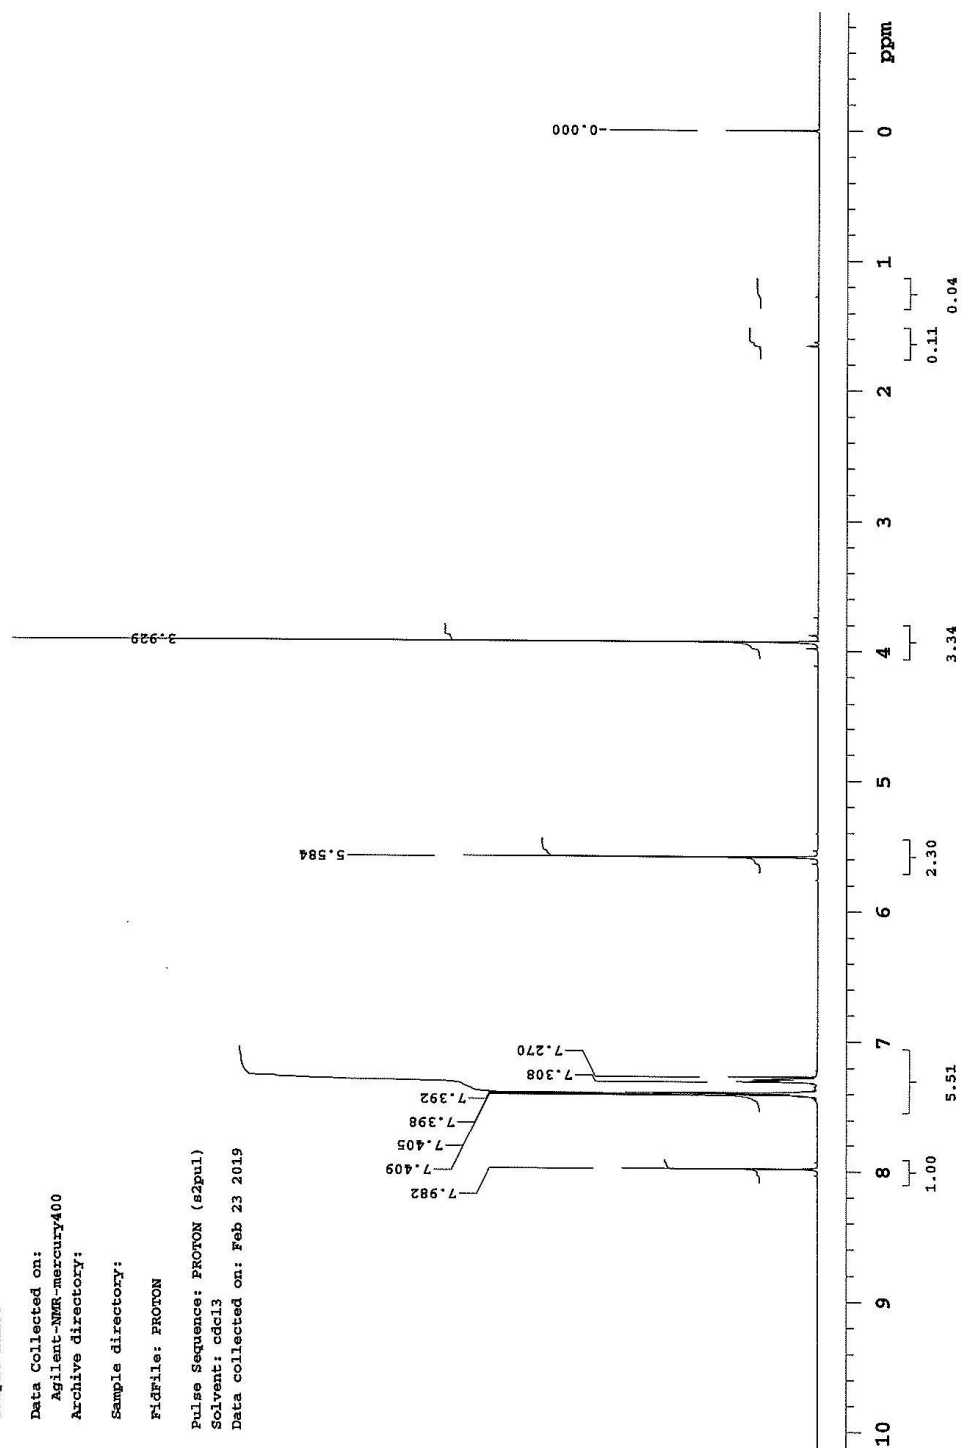

Conventional product **2** from 50% excess of methyl propiolate.

S-46

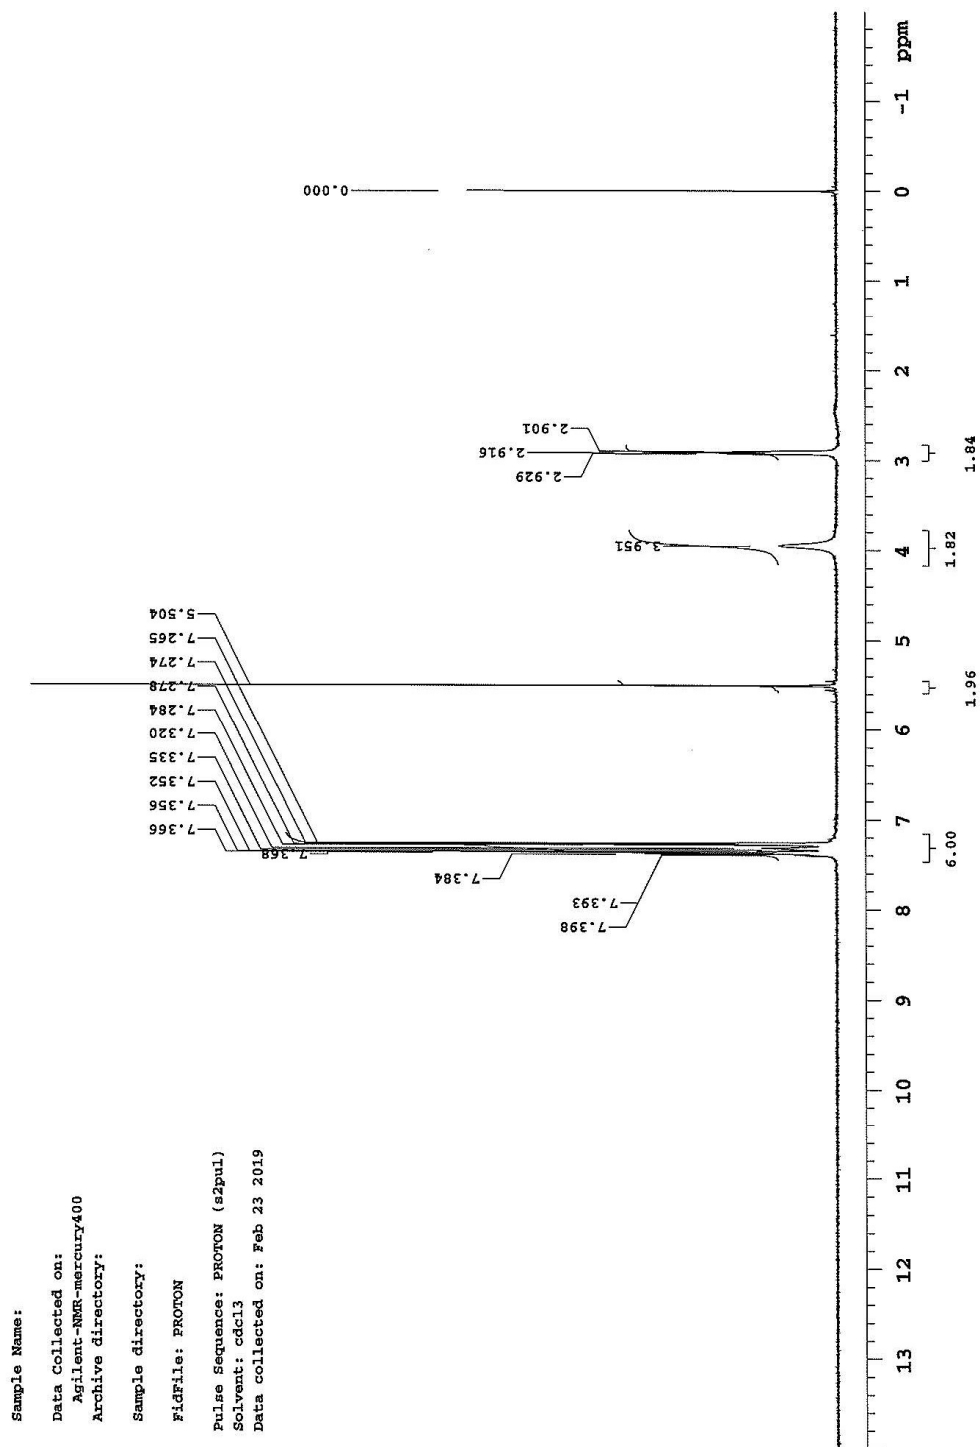

Conventional product 3 from 50% excess of 3-butyne-1-ol.

S-47

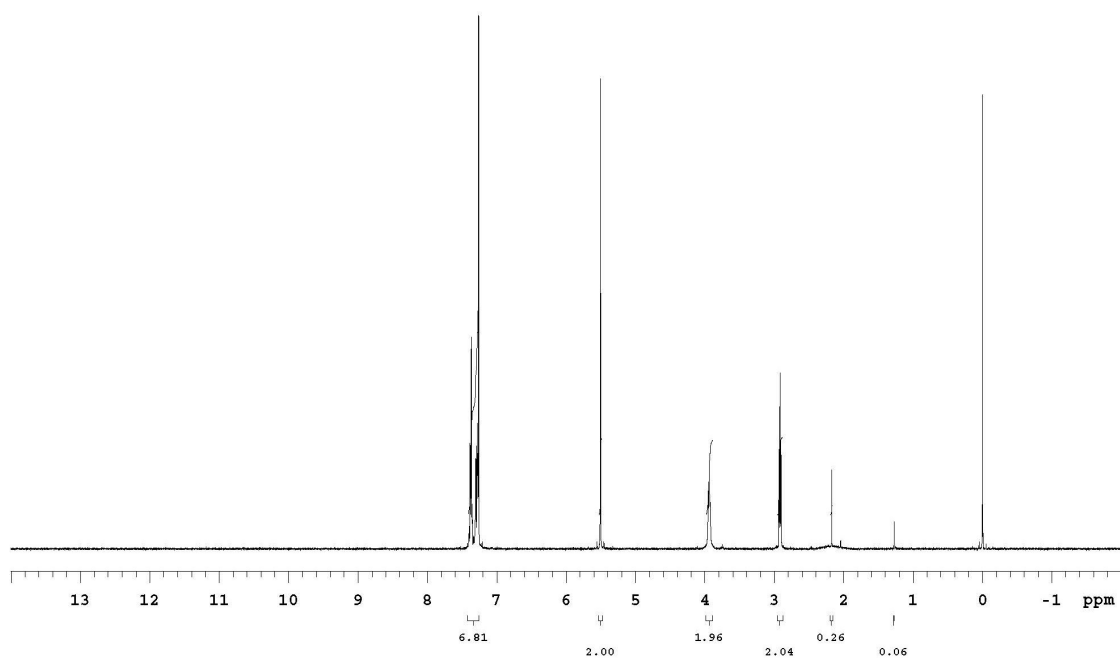

|                                                                                                                                   |                                |                                                                |  |                                                                                                                                 |
|-----------------------------------------------------------------------------------------------------------------------------------|--------------------------------|----------------------------------------------------------------|--|---------------------------------------------------------------------------------------------------------------------------------|
| <b>PULSE SEQUENCE</b><br>Relax. delay 1.000 sec<br>Pulse 45.0 degrees<br>Acq. time 2.561 sec<br>Width 6398.0 Hz<br>16 repetitions | <b>OBSERVE</b> H1, 399.9180595 | <b>DATA PROCESSING</b><br>FT size 32768<br>Total time 1 minute |  | Excess Alkyne, MW<br>3-Butyn-1-ol<br>Solvent: cdcl3<br>Temp. 25.0 C / 298.1 K<br>Operator: chem337<br>Mercury-400 "Agilent-NMR" |
|-----------------------------------------------------------------------------------------------------------------------------------|--------------------------------|----------------------------------------------------------------|--|---------------------------------------------------------------------------------------------------------------------------------|



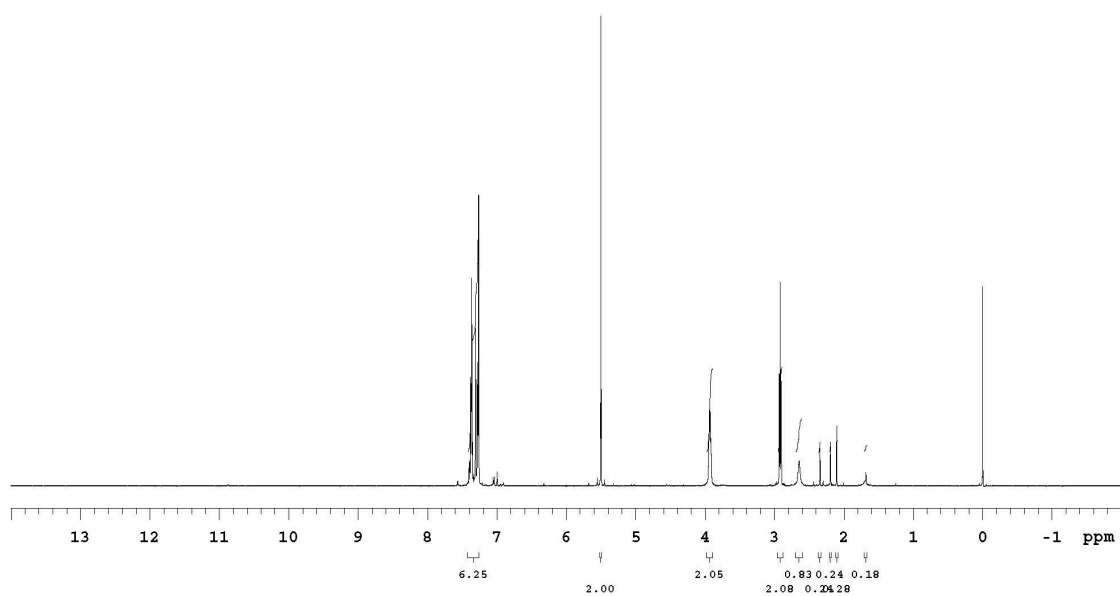

|                                                                                                                                   |                                |                                                                |  |                                                                                            |
|-----------------------------------------------------------------------------------------------------------------------------------|--------------------------------|----------------------------------------------------------------|--|--------------------------------------------------------------------------------------------|
| <b>PULSE SEQUENCE</b><br>Relax. delay 1.000 sec<br>Pulse 45.0 degrees<br>Acq. time 2.561 sec<br>Width 6398.0 Hz<br>16 repetitions | <b>OBSERVE</b> H1, 399.9180588 | <b>DATA PROCESSING</b><br>FT size 32768<br>Total time 1 minute |  | Excess Alkyne, Ison<br>3-Butyn-1-ol                                                        |
|                                                                                                                                   |                                |                                                                |  | Solvent: cdcl3<br>Temp. 25.0 C / 298.1 K<br>Operator: chem337<br>Mercury-400 "Agilent-NMR" |

Solvent-free product **3** from 50% excess of 3-butyn-1-ol.

S-49
